# Supplementary material for: Down but Not Out: The Role of MicroRNAs in Hibernating Bats
Source: PLoS One. 2015 Aug 5;10(8):e0135064. doi: 10.1371/journal.pone.0135064 (PMC4526555; doi:10.1371/journal.pone.0135064)
Supplement: S6 Table — (A) 90 conserved miRNA hairpins. (B) 101 novel miRNA hairpins. (XLSX) [file pone.0135064.s009.xlsx]

## Sheet: A
Pre Name	Hairpin	Genome Pos Class		Class	# of Uniqe	Total Times	5‘ Total Expression					3‘ Total Expression
		Pos Class	Correspoding Gene				Total Times of Sequenced	AA	AB	HA	HB	Total Times of Sequenced	AA	AB	HA	HB	Name	Sequence	Length	Total Times	AA	AB	HA	HB	Name	Sequence	Length	Total Times	AA	AB	HA	HB
mir-10	GL430021_962536_962651_-	InterGenic		Both	14	6811	6807	2573	83	4118	33	4	3	0	1	0	miR-10-5p	TACCCTGTAGATCCGAATTTGT	22	2819	1097	52	1655	15	miR-10-3p	CAAATTCGTATCTAGGGGAA	20	2	2	0	0	0
mir-100	GL430033_1251916_1251997_+	InterGenic		Both	34	1986627	1985942	744684	505969	331831	403458	685	261	170	83	171	miR-100-5p	AACCCGTAGATCCGATCTTGT	21	850873	297206	220756	111620	221291	miR-100-3p	CAAGCTCGCTTCTATGGGTCT	21	179	73	43	21	42
mir-101-1	GL429830_3880681_3880761_-	InterGenic		3prime	5	20454						20454	6825	3614	5525	4490									miR-101-3p	TACAGTACTGTGATAACTGAAG	22	20115	6753	3546	5448	4368
mir-101-2	GL429897_2915669_2915738_+	Intron	ENSMLUG00000009654	3prime	5	20454						20454	6825	3614	5525	4490									miR-101-3p	TACAGTACTGTGATAACTGAAG	22	20115	6753	3546	5448	4368
mir-1-1	GL429967_772129_772225_-	InterGenic		3prime	9	472439						472439	220624	15650	211972	24193									miR-1-3p	TGGAATGTAAAGAAGTATGTAT	22	434480	202291	14019	196202	21968
mir-1-2	GL430323_411489_411722_+	InterGenic		3prime	5	440294						440294	204880	14241	198996	22177									miR-1-3p	TGGAATGTAAAGAAGTATGTAT	22	434480	202291	14019	196202	21968
mir-124a	GL429768_37509295_37509377_+	InterGenic		Both	30	1565070	589	0	243	0	346	1564481	554	784945	601	778381	miR-124-5p	CGTGTTCACAGCGGACCTTGA	21	354	0	143	0	211	miR-124a-3p	TAAGGCACGCGGTGAATG	18	866242	292	449967	286	415697
mir-124b	GL429844_3447089_3447137_-	InterGenic		3prime	8	107255						107255	50	65794	112	41299									miR-124b-3p	TAAGGCACGCGGTGAATGCCAA	22	101576	50	62399	111	39016
mir-125	GL430033_1297432_1297500_+	InterGenic		3prime	5	183						183	38	74	14	57									miR-125-3p	ACAAGTCAGGCTCTTGGGACCT	22	79	20	35	3	21
mir-129-1	GL429840_83341_83573_-	InterGenic		Both	28	65396	2430	227	1379	136	688	62966	2643	17529	1602	41192	miR-129-5p	CTTTTTGCGGTCTGGGCTTG	20	1183	124	594	89	376	miR-129-3p	AAGCCCTTACCCCAAAAAGCAT	22	51577	2060	14360	1104	34053
mir-129-2	GL429980_1119613_1119795_-	InterGenic		Both	21	65235	2392	225	1350	136	681	62843	2641	17488	1599	41115	miR-129-5p	CTTTTTGCGGTCTGGGCTTG	20	1183	124	594	89	376	miR-129-3p	AAGCCCTTACCCCAAAAAGCAT	22	51577	2060	14360	1104	34053
mir-1298	GL429769_21505188_21505288_-	InterGenic		Both	38	2180	1646	0	698	0	948	534	0	215	0	319	miR-1298-5p	TTCATTCGGATGTCCAGATGT	21	646	0	238	0	408	miR-1298-3p	CATCTGGGCAACTGATTGA	19	147	0	50	0	97
mir-130	GL429864_1166930_1167150_-	InterGenic		3prime	4	6551						6551	4384	285	1481	401									miR-130-3p	CAGTGCAATGTTAAAAGGGCAT	22	4829	3108	221	1224	276
mir-133-1	GL429967_768392_768477_-	InterGenic		3prime	6	761						761	590	16	145	10									miR-133-3p	TTGGTCCCCTTCAACCAGCTGT	22	428	331	9	84	4
mir-133-2	GL430323_420356_420423_+	InterGenic		3prime	6	761						761	590	16	145	10									miR-133-3p	TTGGTCCCCTTCAACCAGCTGT	22	428	331	9	84	4
mir-135	GL429777_4860676_4860883_-	InterGenic		3prime	6	3580						3580	2	2028	9	1541									miR-135-3p	TGTAGGGATGGAAGCCATGAA	21	1857	2	1110	7	738
mir-138	GL430086_901210_901294_+	InterGenic		3prime	6	175						175	4	67	0	104									miR-138-3p	GCTACTTCACAACACCAGGGT	21	123	4	49	0	70
mir-139	GL429905_592016_592121_+	InterGenic		3prime	7	4062						4062	1178	1722	794	368									miR-139-3p	TGGAGACGCGGCCCTGTTGGAGT	23	3183	912	1430	545	296
mir-140	GL429855_987430_987523_+	Intron	ENSMLUG00000005409	3prime	15	479288						479288	145899	101800	139567	92022									miR-140-3p	ACCACAGGGTAGAACCACGGA	21	188492	48359	42597	49098	48438
mir-142	GL429925_2469929_2470119_-	InterGenic		Both	10	4109	4048	1706	135	1949	258	61	40	1	18	2	miR-142-5p	CCCATAAAGTAGAAAGCACT	20	2048	895	59	958	136	miR-142-3p	GTAGTGTTTCCTACTTTATGGA	22	58	37	1	18	2
mir-145	GL429969_325528_325611_-	InterGenic		3prime	4	894						894	371	30	459	34									miR-145-3p	ATTCCTGGAAATACTGTTCT	20	420	173	7	218	22
mir-1468	GL429771_8627747_8627817_-	Intron	ENSMLUG00000002051	Both	7	859	854	552	29	246	27	5	4	0	0	1	miR-1468-5p	CTCCGTTTGCCTGTTTTGCT	20	590	408	19	141	22	miR-1468-3p	GAAAAATAAGCAAATGGAAA	20	3	2	0	0	1
mir-148	GL429927_2746406_2746488_+	Intron	ENSMLUG00000015971	3prime	8	4632						4632	1240	1240	1079	1073									miR-148-3p	TCAGTGCATCACAGAACTTTGT	22	4182	1129	1159	944	950
mir-151	GL430721_38439_38511_-	Intron	ENSMLUG00000010955	3prime	3	5998						5998	1946	1566	1338	1148									miR-151-3p	CTAGACTGAAGCTCCTTGAGGA	22	5806	1860	1529	1297	1120
mir-153	GL430238_4005_4087_+	Intron	ENSMLUG00000023435	Both	13	679	359	0	149	0	210	320	0	137	0	183	miR-153-5p	GTCATTTTTGTGGCGTTGCAG	21	271	0	107	0	164	miR-153-3p	TTGCATAGTCACAAAAGTGATCA	23	190	0	92	0	98
mir-154	GL430246_628522_628604_-	InterGenic		3prime	9	15709						15709	127	7755	141	7686									miR-154-3p	AATCATACATGGTAGACCTGTTT	23	14220	115	7011	117	6977
mir-16-1	GL429774_8829468_8829653_-	InterGenic		Both	12	43214	43196	24252	2897	13820	2227	18	3	2	6	7	miR-16-5p	TAGCAGCACGTAAATATTGGCG	22	19161	10813	1138	6453	757	miR-16-1-3p	CCAGTATTAACTGTGCTGCTGA	22	8	2	1	1	4
mir-16-2	GL430190_668619_668731_-	Intron	ENSMLUG00000013213	Both	13	46728	46721	26221	3142	14926	2432	7	3	0	2	2	miR-16-5p	TAGCAGCACGTAAATATTGGCG	22	19161	10813	1138	6453	757	miR-16-2-3p	ACCAATATTATTGTGCTGCTTT	22	5	3	0	2	0
mir-181a	GL429940_1292823_1292904_-	InterGenic		3prime	1	181						181	40	69	12	60									miR-181a-3p	ACCACCGACCGTTGACTGTACC	22	181	40	69	12	60
mir-181b-1	GL430077_484525_484603_+	InterGenic		3prime	5	102						102	3	35	2	62									miR-181b-3p	ACCATCGACCGTTGAGTGGAC	21	51	1	13	2	35
mir-181b-2	GL430077_484536_484768_+	InterGenic		3prime	5	102						102	3	35	2	62									miR-181b-3p	ACCATCGACCGTTGAGTGGAC	21	51	1	13	2	35
mir-181c	GL431633_27214_27374_+	InterGenic		3prime	6	294						294	13	102	3	176									miR-181c-3p	ACCATCGACCGTTGATTGTAC	21	248	13	81	0	154
mir-185	GL430349_364893_365021_+	InterGenic		5prime	1	2633	2633	457	1178	218	780						miR-185-5p	AGGGGCTGGCTTTCCTCT	18	2633	457	1178	218	780
mir-193	GL430271_170165_170245_-	InterGenic		3prime	8	953						953	726	9	199	19									miR-193-3p	AACTGGCCCACAAAGTCCCGCT	22	665	541	5	106	13
mir-199	GL430486_38011_38073_+	InterGenic		Both	24	1196271	1663	1104	24	514	21	1194608	878825	14535	289108	12140	miR-199-5p	CCCAGTGTTCAGACTACCT	19	1468	988	22	442	16	miR-199-3p	ACAGTAGTCTGCACATTGGTT	21	629182	458628	8024	156158	6372
mir-200a	AAPE02068552_5595_5747_+	InterGenic		3prime	5	688						688	0	395	57	236									miR-200a-3p	TAACACTGTCTGGTAACGATGTT	23	334	0	204	30	100
mir-200b	GL429777_8361475_8361710_+	InterGenic		3prime	6	656						656	36	131	444	45									miR-200b-3p	TAATACTGCCGGGTAATGATGG	22	420	28	99	269	24
mir-206	GL429878_2823387_2823469_+	InterGenic		3prime	4	14772						14772	6236	2057	4748	1731									miR-206-3p	TGGAATGTAAGGAAGTGTGTGG	22	14543	6139	2031	4662	1711
mir-218a	GL429914_2009281_2009368_+	Intron-Exon-Intron	ENSMLUG00000016405	Both	6	1125	1123	42	384	13	684	2	1	0	0	1	miR-218a-5p	TTGTGCTTGATCTAACCATGT	21	583	23	219	11	330	miR-218a-3p	CATGGTTCCGTCAAGCACCAT	21	2	1	0	0	1
mir-218b	GL430161_263900_264087_-	Intron	ENSMLUG00000013034	Both	5	510	501	16	154	2	329	9	0	2	0	7	miR-218b-5p	TTGTGCTTGATCTAACCAT	19	250	7	78	1	164	miR-218b-3p	ATGGTTCTGTCAAGCACCG	19	6	0	2	0	4
mir-219	GL430232_205377_205469_-	InterGenic		Both	26	141046	7073	14	2547	6	4506	133973	33	76428	30	57482	miR-219-5p	TGATTGTCCAAACGCAATTC	20	2563	6	894	0	1663	miR-219-3p	AGAATTGTGGCTGGACATCT	20	89179	18	49302	12	39847
mir-22	GL430029_951169_951287_+	InterGenic		3prime	4	23636						23636	10323	1426	9907	1980									miR-22-3p	AAGCTGCCAGTTGAAGAACTGT	22	23462	10259	1419	9822	1962
mir-221	GL429843_4515181_4515253_-	InterGenic		Both	16	1067	1043	107	302	56	578	24	3	9	2	10	miR-221-5p	ACCTGGCATACAATGTAG	18	437	51	120	19	247	miR-221-3p	CTACATTGTCTGCTGGGTTT	20	6	2	0	2	2
mir-222	GL429843_4515818_4515988_-	InterGenic		Both	19	27402	382	46	32	169	135	27020	6476	9693	8179	2672	miR-222-5p	GGCTCAGTAGTCAGTGTA	18	290	35	24	133	98	miR-222-3p	AGCTACATCTGGCTACTGGGTC	22	12491	2639	5218	3277	1357
mir-24	GL430127_480650_480748_-	InterGenic		3prime	9	4946						4946	1793	1106	1407	640									miR-24-3p	TGGCTCAGTTCAGCAGGAACAG	22	4582	1670	1031	1290	591
mir-28	GL429781_6409461_6409656_-	Intron	ENSMLUG00000009198	Both	6	7421	1	0	0	0	1	7420	3828	852	2358	382	miR-28-5p	CAAGGAGCTCACAGTCTATT	20	1	0	0	0	1	miR-28-3p	CACTAGATTGTGAGCTCCTGGA	22	6634	3436	753	2141	304
mir-285-1	GL429813_5882100_5882185_+	InterGenic		Both	17	55492	1	0	0	0	1	55491	8073	13857	6475	27086	miR-285-1-5p	GCTGGTTTCATATGGTGG	18	1	0	0	0	1	miR-285-3p	TAGCACCATTTGAAATCAGT	20	45462	6497	11475	5558	21932
mir-285-2	GL429912_3222813_3223010_-	InterGenic		Both	21	55587	45	1	15	9	20	55542	8079	13871	6483	27109	miR-285-2-5p	GCTGGTTTCACATGGTGGCTT	21	26	0	9	8	9	miR-285-3p	TAGCACCATTTGAAATCAGT	20	45462	6497	11475	5558	21932
mir-29	GL429813_5882466_5882529_+	InterGenic		Both	40	2525516	407	68	154	65	120	2525109	445007	582067	439298	1058737	miR-29-5p	ACTGATTTCTTTTGGTGTTCA	21	276	53	108	32	83	miR-29-3p	TAGCACCATCTGAAATCGGTTA	22	1946308	357670	416098	373410	799130
mir-30a	GL429804_2510663_2510749_-	Intron	ENSMLUG00000007242	3prime	3	304						304	86	117	23	78									miR-30a-3p	CTGGGAGAGGGTTGTTTACTC	21	217	58	84	21	54
mir-30b	GL429826_3018093_3018170_-	InterGenic		3prime	2	823						823	358	114	234	117									miR-30b-3p	TGGGAGAAGGCTGTTTACTC	20	805	351	111	228	115
mir-30c	GL429826_3040843_3040967_-	InterGenic		3prime	13	7310						7310	2817	1345	2307	841									miR-30c-3p	CTTTCAGTCGGATGTTTGCAG	21	3271	1182	542	1113	434
mir-30d	GL430074_342023_342133_-	InterGenic		3prime	9	172						172	62	39	29	42									miR-30d-3p	CTTTCAGTCAGATGTTTGCTAC	22	83	28	26	16	13
mir-3135	GL429808_5988153_5988364_-	Exon-InterGenic	ENSMLUG00000024327	5prime	6	14617	14617	9871	2200	945	1601						miR-3135-5p	GGCTGGTCCGAGTGCAGT	18	6682	4874	808	361	639
mir-361	GL429771_1047221_1047305_+	Intron	ENSMLUG00000011286	5prime	4	149	149	53	29	16	51						miR-361-5p	TTATCAGAATCTCCAGGGG	19	110	41	22	11	36
mir-363	GL429769_5437720_5437808_+	InterGenic		3prime	11	1695						1695	203	658	356	478									miR-363-3p	AATTGCACGGTATCCATCT	19	590	66	210	134	180
mir-365	GL429924_110885_110973_-	InterGenic		Both	9	1920	334	193	3	138	0	1586	950	17	594	25	miR-365-5p	AAGGGACTTTCAGGGGCAGC	20	224	113	3	108	0	miR-365-3p	TAATGCCCCTAAAAATCCTTAT	22	947	598	7	330	12
mir-378	GL429969_120808_121045_-	InterGenic		3prime	16	208760						208760	189686	4851	12648	1575									miR-378-3p	ACTGGACTTGGAGTCAGAAGGC	22	198036	180178	4624	11775	1459
mir-381	GL430246_642373_642459_-	InterGenic		Both	14	6045	2403	122	1126	29	1126	3642	223	1392	72	1955	miR-381-5p	AGCGAGGTTGCCCTTTGTAT	20	1809	88	801	18	902	miR-381-3p	TATACAAGGGCAAGCTCTCT	20	1600	140	608	46	806
mir-383	GL429968_1908086_1908182_+	InterGenic		Both	17	5595	5589	4	2144	6	3435	6	0	6	0	0	miR-383-5p	CAGATCAGAAGGTGATTG	18	2589	3	894	2	1690	miR-383-3p	ACAGCACTACCTGGTCAGAAA	21	2	0	2	0	0
mir-3958	GL430246_649362_649559_-	InterGenic		Both	19	1116615	20	1	6	0	13	1116595	23209	460927	16289	616170	miR-3958-5p	AGGTTGTCCGTGATGTATTTGC	22	9	0	2	0	7	miR-3958-3p	AGATATTGCACGGTTGATCT	20	564017	11177	226127	6683	320030
mir-432	GL430246_769336_769461_-	InterGenic		Both	18	17521	17500	1984	10104	462	4950	21	0	6	0	15	miR-432-5p	TCTTGGAGTAGGTCATTGGG	20	8177	1014	4927	188	2048	miR-432-3p	CTGGATGGCTCCTCCATGTCT	21	12	0	4	0	8
mir-448	GL429769_21416279_21416392_-	Intron	ENSMLUG00000000264	Both	21	11181	28	1	9	0	18	11153	1012	5137	101	4903	miR-448-5p	AACATCCTGCATAGTGCTGCCA	22	8	0	5	0	3	miR-448-3p	TTGCATATGTAGGATGTCCCA	21	8783	739	4138	77	3829
mir-455	GL430387_342008_342185_+	Intron	ENSMLUG00000009089	3prime	4	1134						1134	600	219	75	240									miR-455-3p	GCAGTCCATGGGCATATACAC	21	1010	535	201	65	209
mir-485	GL430246_632847_632936_-	InterGenic		3prime	5	13794						13794	536	9866	173	3219									miR-485-3p	GTCATACACGGCTCTCCTCTCT	22	13679	532	9794	173	3180
mir-486	GL429961_2270098_2270270_+	InterGenic		Both	12	7036	5829	2520	474	2601	234	1207	507	388	221	91	miR-486-5p	TCCTGTACTGAGCTGCCCCGA	21	4033	1763	326	1795	149	miR-486-3p	CGGGGCAGCTCAGTACAGGATG	22	809	365	238	151	55
mir-503	GL429769_5135412_5135498_+	InterGenic		Both	12	7151	7134	3117	289	3355	373	17	7	0	7	3	miR-503-5p	TAGCAGCGGGAACAGTACT	19	4313	1713	146	2209	245	miR-503-3p	GGAGTATTGTTTCTGCTGCCCGG	23	8	4	0	3	1
mir-532	GL429963_1431911_1431993_+	InterGenic		3prime	6	865						865	346	195	208	116									miR-532-3p	CCTCCCACACCCAAGGCTTGCA	22	835	333	189	201	112
mir-539	GL430246_641073_641227_-	InterGenic		Both	13	369	196	8	115	4	69	173	2	93	2	76	miR-539-5p	GGAGAAATTATCCTTGGTGTGC	22	90	2	54	3	31	miR-539-3p	CATACAAGGACAATTTCTTTTT	22	64	0	37	2	25
mir-544	GL429939_2811236_2811337_-	InterGenic		5prime	7	1730	1730	24	635	7	1064						miR-544-5p	TCTTGTTAAAAGGCAGATTCT	21	1507	22	550	6	929
mir-551	GL429820_3743031_3743161_-	InterGenic		3prime	3	199						199	0	67	0	132									miR-551-3p	GCGACCCATACTTGGTTTCAG	21	189	0	63	0	126
mir-574a	GL429860_3489770_3489919_+	InterGenic		5prime	9	761	761	653	62	41	5						miR-574a-5p	TGAGTGTGTGTGTGTGAGT	19	400	338	31	27	4
mir-574b-1	GL429895_1228194_1228275_-	InterGenic		5prime	1	153	153	130	19	3	1						miR-574b-5p	TGAGTGTGTGTGTGTGAG	18	153	130	19	3	1
mir-574b-2	GL429965_55022_55260_+	InterGenic		5prime	2	166	166	141	19	5	1						miR-574b-5p	TGAGTGTGTGTGTGTGAG	18	153	130	19	3	1
mir-590	GL429812_5296041_5296121_-	Intron	ENSMLUG00000009053	3prime	5	262						262	112	14	69	67									miR-590-3p	TAATTTTATGTATAAGCTAGT	21	136	55	7	33	41
mir-6119	GL429769_17127893_17127978_+	Intron	ENSMLUG00000000421	3prime	13	367						367	168	63	66	70									miR-6119-3p	CAAATCATTTTTTACTCTCCA	21	118	79	14	20	5
mir-744	GL430183_350520_350755_+	Intron	ENSMLUG00000002023	Both	10	782	777	67	316	73	321	5	0	2	0	3	miR-744-5p	GCGGGGCTAGGGCTAACAGCA	21	436	47	149	54	186	miR-744-3p	CTGTTGCCACTAACCTCAACCT	22	2	0	2	0	0
mir-7a	GL429936_497702_497832_-	Intron	ENSMLUG00000000179	Both	19	3722	3714	692	1441	271	1310	8	5	0	0	3	miR-7a-5p	TGAGGTAGTAAGTTGTATTGT	21	1540	246	538	107	649	miR-7a-3p	CTATACAACTTACTACTTT	19	2	2	0	0	0
mir-7b	GL430033_1252637_1252728_+	InterGenic		Both	14	1150670	1150656	378365	314751	183554	273986	14	3	4	0	7	miR-7b-5p	TGAGGTAGTAGGTTGTATGGTT	22	702587	249770	200325	118816	133676	miR-7b-3p	CTGTACAACCTTCTAGCTTTCC	22	10	2	4	0	4
mir-7c	GL430062_1131654_1131769_+	Intron	ENSMLUG00000005871	Both	9	33775	32436	325	10140	983	20988	1339	210	409	95	625	miR-7c-5p	TGGAAGACTAGTGATTTT	18	32436	325	10140	983	20988	miR-7c-3p	CAACAAATCACAGTCTGCCATA	22	562	102	211	36	213
mir-7d	GL430399_357104_357162_+	InterGenic		Both	21	2463123	2463051	692708	632344	505537	632462	72	17	20	5	30	miR-7d-5p	TGAGGTAGTAGGTTGTATAGTT	22	1288513	366251	364795	312837	244630	miR-7d-3p	CTATACAATCTACTGTCTTT	20	25	5	6	3	11
mir-7e	GL430399_357479_357550_+	InterGenic		Both	19	735233	735211	184284	183368	148172	219387	22	17	2	1	2	miR-7e-5p	TGAGGTAGTAGATTGTATAGTT	22	325423	84535	84358	83869	72661	miR-7e-3p	CTATACAATCTATTGCCTTC	20	8	8	0	0	0
mir-7f	GL430399_360023_360109_+	InterGenic		Both	29	312340	312261	48431	170580	33386	59864	79	27	29	11	12	miR-7f-5p	AGAGGTAGTAGGTTGCATAGTT	22	227183	36531	134582	22072	33998	miR-7f-3p	TATACGACCTGCTGCCTTTCT	21	25	9	14	1	1
mir-7g	GL430541_226558_226685_-	Intron	ENSMLUG00000015247	Both	14	115650	115648	27718	33054	19105	35771	2	0	1	0	1	miR-7g-5p	TGAGGTAGTAGTTTGTACAGTT	22	53538	14568	15388	11519	12063	miR-7g-3p	CTGTACAGGCCACTGCCTTG	20	1	0	0	0	1
mir-873	GL429885_3306897_3306984_+	InterGenic		3prime	4	110						110	0	59	2	49									miR-873-3p	GAGACTGACGAGTTCCCGGGAA	22	83	0	47	0	36
mir-876	GL429885_3329592_3329682_+	InterGenic		Both	7	185	165	0	48	0	117	20	0	3	0	17	miR-876-5p	TGGATTTCTTTGTGAATCACC	21	55	0	19	0	36	miR-876-3p	GTGGTTTACAAAGTAATTCA	20	12	0	2	0	10
mir-9	GL429767_30217938_30218022_+	InterGenic		3prime	13	12231						12231	14	6737	15	5465									miR-9-3p	TAAAGCTAGATAACCGAAAGTA	22	5002	11	2918	3	2070
mir-92a-1	GL429769_5437570_5437646_+	InterGenic		3prime	5	5691						5691	3222	706	1397	366									miR-92a-3p	TATTGCACTTGTCCCGGCCTGT	22	3072	1767	363	767	175
mir-92a-2	GL429831_4655952_4656020_-	InterGenic		3prime	5	3417						3417	1940	392	883	202									miR-92a-3p	TATTGCACTTGTCCCGGCCTGT	22	3072	1767	363	767	175
mir-92b	GL429978_2198359_2198559_-	InterGenic		3prime	14	18499						18499	64	11279	135	7021									miR-92b-3p	TATTGCACTCGTCCCGGCCT	20	9041	37	4929	127	3948

## Sheet: B
Pre Name	Hairpin	Genome Pos Class		Class	# of Uniqe	Total Times	5‘ Total Expression					3‘ Total Expression
		Pos Class	Correspoding Gene				Total Times of Sequenced	AA	AB	HA	HB	Total Times of Sequenced	AA	AB	HA	HB	Name	Sequence	Length	Total Times	AA	AB	HA	HB	Name	Sequence	Length	Total Times	AA	AB	HA	HB
novel-10-1	GL430233_387740_387801_+	InterGenic		Both	34	322	4	0	0	4	0	318	48	13	241	16	Novel-10-5p	AGTGGGAGGCCCCCGGCGCC	20	2	0	0	2	0	Novel-10-3p	GGGGCACGCCGGCCTTGCGG	20	111	11	1	96	3
novel-10-2	GL430546_95455_95516_+	InterGenic		Both	37	330	4	0	0	4	0	326	48	13	249	16	Novel-10-5p	AGTGGGAGGCCCCCGGCGCC	20	2	0	0	2	0	Novel-10-3p	GGGGCACGCCGGCCTTGCGG	20	111	11	1	96	3
novel-11	GL430033_1251916_1251997_+	InterGenic		3prime	4	226						226	99	60	30	37									Novel-11-3p	CAAGCTCGCTTCTATGGGTCTGT	23	108	51	24	19	14
novel-12	GL429929_1596132_1596212_-	InterGenic		3prime	2	111						111	38	13	29	31									Novel-12-3p	GTTAATAATGCGGATTTTG	19	105	37	13	29	26
novel-13	GL430017_1746478_1746645_-	InterGenic		3prime	3	106						106	10	59	20	17									Novel-13-3p	TACGGCCAAGCACCCGCAGGG	21	97	10	56	16	15
novel-14-1	GL429771_21430811_21431027_+	InterGenic		3prime	3	157						157	54	3	97	3									Novel-14-3p	AAATTTCTGGAGGATGAG	18	97	31	1	63	2
novel-14-2	GL429838_80208_80430_-	InterGenic		3prime	2	99						99	32	1	64	2									Novel-14-3p	AAATTTCTGGAGGATGAG	18	97	31	1	63	2
novel-14-3	GL429940_1790134_1790289_+	InterGenic		3prime	3	157						157	54	3	97	3									Novel-14-3p	AAATTTCTGGAGGATGAG	18	97	31	1	63	2
novel-15	GL429870_2033523_2033610_+	InterGenic		3prime	9	3049						3049	69	1984	8	988									Novel-15-3p	TAGAAACGTCCAGAGGCACCG	21	1669	38	1067	5	559
novel-16	GL429804_334652_334738_-	Intron	ENSMLUG00000016034	Both	4	119	2	2	0	0	0	117	65	34	13	5	Novel-16-5p	TGGCCTGCCCGCCAGTCGG	19	2	2	0	0	0	Novel-16-3p	GCCGACAGGCGGGCAGGACCAG	22	87	49	25	10	3
novel-17	GL429934_2541461_2541559_-	InterGenic		3prime	2	87						87	57	6	17	7									Novel-17-3p	CGAGGACCATCGGTTGGCGACT	22	81	57	6	12	6
novel-18a	GL431225_13098_13209_-	InterGenic		3prime	62	9728						9728	2021	809	4040	2858									Novel-18a-3p	TGACTATCTAGAGGAAGTA	19	1471	282	144	222	823
novel-18b	GL430816_55510_55621_-	InterGenic		Both	24	1806	1001	287	122	172	420	805	190	90	183	342	Novel-18b-5p	TACCGATTGGATGGTTTA	18	259	81	31	55	92	Novel-18b-3p	TGACTATCTAGAGGAAGT	18	344	79	51	41	173
novel-19	GL430179_187905_188138_-	InterGenic		3prime	7	114						114	36	42	26	10									Novel-19-3p	TTTCCGGAGGATGAGGCCCAGT	22	78	28	29	14	7
novel-1a-1	GL429776_4537373_4537517_-	InterGenic		3prime	4	344						344	224	45	58	17									Novel-1a-3p	TGATCAGCCGTTGCCTCTCTCT	22	164	99	28	30	7
novel-1a-2	GL429808_8037172_8037296_+	Intron	ENSMLUG00000001844	Both	5	227	2	0	1	1	0	225	136	38	40	11	Novel-1a-5p	AGAGAGAGGCAGGGTCTGAT	20	2	0	1	1	0	Novel-1a-3p	TGATCAGCCGTTGCCTCTCTCT	22	164	99	28	30	7
novel-1a-3	GL429838_1833084_1833228_+	InterGenic		Both	5	227	2	0	1	1	0	225	136	38	40	11	Novel-1a-5p	AGAGAGAGGCAGGGTCTGAT	20	2	0	1	1	0	Novel-1a-3p	TGATCAGCCGTTGCCTCTCTCT	22	164	99	28	30	7
novel-1b-1	GL429926_2047418_2047629_-	InterGenic		3prime	1	121						121	89	7	19	6									Novel-1b-3p	TGATCAGCCGTTGCCTCTCT	20	121	89	7	19	6
novel-1b-2	GL429947_2074760_2074924_-	Intron	ENSMLUG00000016920	3prime	2	178						178	123	17	28	10									Novel-1b-3p	TGATCAGCCGTTGCCTCTCT	20	121	89	7	19	6
novel-1c-1	GL429769_2896596_2896806_-	InterGenic		3prime	1	57						57	34	10	9	4									Novel-1c-3p	TGATCAGCCGTTGCCTCTCTC	21	57	34	10	9	4
novel-1c-2	GL429849_2490645_2490779_-	InterGenic		3prime	1	57						57	34	10	9	4									Novel-1c-3p	TGATCAGCCGTTGCCTCTCTC	21	57	34	10	9	4
novel-1c-3	GL429920_1066188_1066255_-	InterGenic		3prime	1	57						57	34	10	9	4									Novel-1c-3p	TGATCAGCCGTTGCCTCTCTC	21	57	34	10	9	4
novel-20-1	GL429788_77849_77924_-	InterGenic		5prime	4	86	86	17	38	15	16						Novel-20-5p	AGGGGATGTCCAACTGTCAGTT	22	77	15	35	14	13
novel-20-2	GL429808_2519302_2519414_-	Intron	ENSMLUG00000006117	5prime	4	86	86	17	38	15	16						Novel-20-5p	AGGGGATGTCCAACTGTCAGTT	22	77	15	35	14	13
novel-20-3	GL429927_1060398_1060469_-	InterGenic		5prime	4	86	86	17	38	15	16						Novel-20-5p	AGGGGATGTCCAACTGTCAGTT	22	77	15	35	14	13
novel-21	GL430644_73224_73441_-	InterGenic		Both	100	10599	11	0	2	9	0	10588	1376	1427	5664	2121	Novel-21-5p	GGCGACCGGCCGCCGCCGG	19	4	0	1	3	0	Novel-21-3p	CCCGGCGGGGAAGGTGGCT	19	1424	122	234	707	361
novel-22	GL429804_5038125_5038248_-	InterGenic		3prime	4	169						169	0	80	0	89									Novel-22-3p	TTGACCAAAGAATAGACCTCCT	22	71	0	36	0	35
novel-23	GL429872_1190977_1191205_+	Intron	ENSMLUG00000010788	3prime	3	98						98	8	34	21	35									Novel-23-3p	GTGAAGCGTTCCATATTTTT	20	71	8	24	17	22
novel-24-1	GL429778_13240476_13240570_-	InterGenic		Both	16	222	44	11	7	10	16	178	29	16	32	101	Novel-24-5p	GATGCTCTTAGCTGAGTG	18	21	9	4	1	7	Novel-24-3p	TGGATACCGCAGCTAGGAAT	20	58	9	7	15	27
novel-24-2	GL430644_77344_77438_-	Intron-Exon	ENSMLUG00000024835	Both	16	222	44	11	7	10	16	178	29	16	32	101	Novel-24-5p	GATGCTCTTAGCTGAGTG	18	21	9	4	1	7	Novel-24-3p	TGGATACCGCAGCTAGGAAT	20	58	9	7	15	27
novel-24-3	GL430816_56474_56568_-	InterGenic		Both	16	222	44	11	7	10	16	178	29	16	32	101	Novel-24-5p	GATGCTCTTAGCTGAGTG	18	21	9	4	1	7	Novel-24-3p	TGGATACCGCAGCTAGGAAT	20	58	9	7	15	27
novel-25a-1	GL429814_850791_851000_+	InterGenic		5prime	18	4418	4418	1016	356	2640	406						Novel-25a-5p	GCGTTGGTGGTATAGTGGTGAG	22	1088	225	97	713	53
novel-25a-2	GL429860_3574073_3574188_+	InterGenic		3prime	16	4223						4223	978	341	2504	400									Novel-25a-3p	GCGTTGGTGGTATAGTGGTGAG	22	1088	225	97	713	53
novel-25a-3	GL430000_726931_726986_+	InterGenic		5prime	6	4021	4021	962	288	2383	388						Novel-25a-5p	GCGTTGGTGGTATAGTGGTGAG	22	1088	225	97	713	53
novel-25b	GL429835_1829534_1829763_+	InterGenic		5prime	2	1007	1007	291	63	515	138						Novel-25b-5p	GCGTTGGTGGTATAGTGG	18	994	291	62	504	137
novel-26-1	GL429774_12134719_12134923_+	InterGenic		5prime	6	77	77	37	8	27	5						Novel-26-5p	AGAGAGGCAGGGTCTGATCCA	21	53	30	4	14	5
novel-26-2	GL430076_126061_126202_-	InterGenic		5prime	6	77	77	37	8	27	5						Novel-26-5p	AGAGAGGCAGGGTCTGATCCA	21	53	30	4	14	5
novel-26-3	GL430076_126132_126213_-	InterGenic		5prime	6	77	77	37	8	27	5						Novel-26-5p	AGAGAGGCAGGGTCTGATCCA	21	53	30	4	14	5
novel-27	GL430325_65510_65580_-	InterGenic		3prime	3	71						71	1	37	2	31									Novel-27-3p	ACAGGATGTGAAGTACAGCT	20	52	1	25	2	24
novel-28-1	GL429767_33730754_33730829_+	InterGenic		5prime	14	253	253	64	17	147	25						Novel-28-5p	AGGATGTCCGACTGACGGCTTA	22	50	6	2	40	2
novel-28-2	GL429864_209469_209593_-	InterGenic		5prime	14	248	248	62	17	145	24						Novel-28-5p	AGGATGTCCGACTGACGGCTTA	22	50	6	2	40	2
novel-28-3	GL429866_4220556_4220765_+	InterGenic		Both	22	670	166	41	12	93	20	504	214	28	223	39	Novel-28-5p	AGGATGTCCGACTGACGGCTTA	22	50	6	2	40	2	Novel-2a-3p	AAGCCGGCAGTCAGACATC	19	157	48	4	89	16
novel-28-4	GL430339_345125_345262_-	Intron	ENSMLUG00000013508	Both	16	266	253	64	17	147	25	13	1	1	11	0	Novel-28-5p	AGGATGTCCGACTGACGGCTTA	22	50	6	2	40	2	Novel-28-3p	TAAGCCGGCAGTCAGACA	18	10	1	1	8	0
novel-29-1	GL429767_58543783_58544018_+	InterGenic		5prime	4	82	82	22	5	51	4						Novel-29-5p	AAGGATGTCCGACTGACGGCT	21	50	14	3	32	1
novel-29-2	GL429888_1378773_1378830_+	Intron	ENSMLUG00000001824	Both	5	104	82	22	5	51	4	22	17	1	3	1	Novel-29-5p	AAGGATGTCCGACTGACGGCT	21	50	14	3	32	1	Novel-29-3p	AAGCCGGCAGTCAGACATCCCC	22	22	17	1	3	1
novel-29-3	GL432579_1200_1319_-	InterGenic		5prime	4	82	82	22	5	51	4						Novel-29-5p	AAGGATGTCCGACTGACGGCT	21	50	14	3	32	1
novel-2a-1	GL429797_9045983_9046126_+	InterGenic		Both	19	599	95	26	12	39	18	504	214	28	223	39	Novel-2a-1-5p	ATGTCCGACTGACGGCTTAGG	21	38	2	2	24	10	Novel-2a-3p	AAGCCGGCAGTCAGACATC	19	157	48	4	89	16
novel-2a-3	GL429964_795095_795167_-	InterGenic		Both	18	579	22	16	0	5	1	557	245	32	237	43	Novel-2a-2-5p	GGATGTCCGACTGCCGGCTTA	21	12	7	0	5	0	Novel-2a-3p	AAGCCGGCAGTCAGACATC	19	157	48	4	89	16
novel-2b-2	GL429805_6862581_6862681_-	InterGenic		3prime	8	275						275	140	20	91	24									Novel-2b-3p	AAGCCGGCAGTCAGACATCC	20	154	71	6	61	16
novel-2b-3	GL429811_365901_366118_+	InterGenic		3prime	7	286						286	151	19	91	25									Novel-2b-3p	AAGCCGGCAGTCAGACATCC	20	154	71	6	61	16
novel-2b-4	GL429874_3371776_3371836_-	InterGenic		3prime	7	286						286	151	19	91	25									Novel-2b-3p	AAGCCGGCAGTCAGACATCC	20	154	71	6	61	16
novel-30	GL430062_855080_855292_+	InterGenic		3prime	9	1441						1441	424	162	295	560									Novel-30-3p	CCTCGACACAAGGGTTTGT	19	947	261	100	202	384
novel-31	GL430246_647311_647400_-	InterGenic		Both	6	1019	5	0	2	0	3	1014	51	430	13	520	Novel-31-5p	AAGGCGGATATTCCTTCTATGT	22	3	0	0	0	3	Novel-31-3p	AACGTAGAGGAAATTCCACCTT	22	910	48	385	12	465
novel-32	GL430737_17214_17452_-	Exon-Intron-Exon	ENSMLUG00000009893	3prime	2	969						969	164	492	46	267									Novel-32-3p	TGTGGCGGAGTTGGTGAC	18	649	118	340	25	166
novel-33	GL429794_4202595_4202807_+	InterGenic		3prime	12	590						590	142	82	133	233									Novel-33-3p	AAAGTCAGCCCTCGACACA	19	343	76	50	82	135
novel-34	GL430011_807627_807833_+	InterGenic		3prime	6	760						760	100	83	104	473									Novel-34-3p	AGGAGTGTGTAACAACTC	18	329	48	29	31	221
novel-35	GL430700_88569_88802_-	InterGenic		5prime	9	823	823	209	46	309	259						Novel-35-5p	GGAATCCGACTGTTTAAT	18	323	69	19	121	114
novel-36	AAPE02067072_8055_8128_+	InterGenic		3prime	3	321						321	12	66	36	207									Novel-36-3p	GCTACTCAGGGGACATTT	18	309	12	64	36	197
novel-37	GL429781_3313718_3313890_+	InterGenic		3prime	5	7486						7486	164	4480	58	2784									Novel-37-3p	TAGGAGCAGTGATAGGTAATAT	22	3841	103	2413	26	1299
novel-38-1	GL429767_15599225_15599420_+	InterGenic		Both	13	524	302	158	20	108	16	222	109	16	77	20	Novel-38-5p	CAGGGGATGTCCGACTGCT	19	238	136	14	80	8	Novel-2b-3p	AAGCCGGCAGTCAGACATCC	20	154	71	6	61	16
novel-38-2	GL429926_1151387_1151592_+	InterGenic		Both	10	318	302	158	20	108	16	16	10	0	3	3	Novel-38-5p	CAGGGGATGTCCGACTGCT	19	238	136	14	80	8	Novel-38-2-3p	AAGCTGGCAGTCGGACATCC	20	8	5	0	2	1
novel-38-3	GL429929_2204367_2204423_+	InterGenic		Both	10	319	302	158	20	108	16	17	9	2	4	2	Novel-38-5p	CAGGGGATGTCCGACTGCT	19	238	136	14	80	8	Novel-38-1-3p	TAAGCCAGCAGTCAGACATCCC	22	7	6	0	0	1
novel-39	GL429770_27021339_27021462_+	InterGenic		5prime	7	737	737	189	58	258	232						Novel-39-5p	GAACTTGACTATCTAGAGGA	20	215	65	11	85	54
novel-3a-1	GL429776_6342574_6342799_+	Intron	ENSMLUG00000010233	Both	14	558	2	0	0	0	2	556	137	170	114	135	Novel-3h-5p	TCGGAAATTCTGTTTCTTTGT	21	2	0	0	0	2	Novel-3a-3p	AAAGACACAGAATTTCCGGAGG	22	154	36	42	33	43
novel-3a-2	GL429801_7723759_7723858_-	InterGenic		3prime	15	567						567	137	175	124	131									Novel-3a-3p	AAAGACACAGAATTTCCGGAGG	22	154	36	42	33	43
novel-3a-3	GL430366_10230_10331_+	InterGenic		3prime	15	567						567	137	175	124	131									Novel-3a-3p	AAAGACACAGAATTTCCGGAGG	22	154	36	42	33	43
novel-3b-1	GL429771_139866_139977_-	Intron	ENSMLUG00000006724	Both	8	176	4	1	0	2	1	172	24	61	12	75	Novel-3b-1-5p	CCTCCGGAAGTTCTGTTTCTTT	22	2	0	0	2	0	Novel-3b-3p	AAAGAAACAGAATTTCCGGAGA	22	153	19	56	12	66
novel-3b-2	GL429778_3400002_3400188_-	InterGenic		Both	8	176	4	1	0	2	1	172	24	61	12	75	Novel-3b-1-5p	CCTCCGGAAGTTCTGTTTCTTT	22	2	0	0	2	0	Novel-3b-3p	AAAGAAACAGAATTTCCGGAGA	22	153	19	56	12	66
novel-3b-3	GL430118_736185_736407_-	InterGenic		Both	7	178	6	2	3	0	1	172	24	61	12	75	Novel-3b-2-5p	TCAGCCTCCGGAAATTCTGTT	21	6	2	3	0	1	Novel-3b-3p	AAAGAAACAGAATTTCCGGAGA	22	153	19	56	12	66
novel-3c-1	GL429888_222182_222420_-	InterGenic		3prime	3	134						134	22	51	11	50									Novel-3c-3p	AAAGAAACAGAATTTCCGGAGT	22	127	19	50	10	48
novel-3c-2	GL431446_12722_12956_-	InterGenic		3prime	3	134						134	22	51	11	50									Novel-3c-3p	AAAGAAACAGAATTTCCGGAGT	22	127	19	50	10	48
novel-3d	GL429925_565126_565362_-	InterGenic		3prime	12	284						284	32	23	105	124									Novel-3d-3p	AAAGAAACAGAACTTCCGGAG	21	122	18	7	40	57
novel-3e-1	GL430076_552171_552387_-	InterGenic		3prime	9	205						205	61	39	39	66									Novel-3e-3p	AAAGACACAGAATTTCCGGAG	21	91	27	24	18	22
novel-3e-2	GL430603_29847_30083_-	InterGenic		3prime	9	204						204	58	39	41	66									Novel-3e-3p	AAAGACACAGAATTTCCGGAG	21	91	27	24	18	22
novel-3f-1	GL429841_3368120_3368340_+	InterGenic		Both	10	113	2	0	0	0	2	111	19	29	18	45	Novel-3f-5p	TCCGGAAATTCTGTTTCTTGT	21	2	0	0	0	2	Novel-3f-3p	AAAGAAACAGAATTTCCGGAA	21	66	12	20	5	29
novel-3f-2	GL429883_930088_930319_+	InterGenic		3prime	9	111						111	19	29	18	45									Novel-3f-3p	AAAGAAACAGAATTTCCGGAA	21	66	12	20	5	29
novel-3f-3	GL429912_1753459_1753696_-	InterGenic		3prime	9	111						111	19	29	18	45									Novel-3f-3p	AAAGAAACAGAATTTCCGGAA	21	66	12	20	5	29
novel-3g	GL431339_12157_12293_-	InterGenic		3prime	3	57						57	7	5	20	25									Novel-3g-3p	AAAGAAACAGAACTTCCGGA	20	50	5	5	19	21
novel-3h-1	GL429773_19531122_19531359_-	Intron	ENSMLUG00000008898	3prime	20	903						903	143	187	344	229									Novel-3h-3p	AAAGAAACAGAACTTCCGGAGG	22	339	57	81	111	90
novel-3h-2	GL430069_634180_634323_+	InterGenic		Both	24	927	2	0	0	0	2	925	144	187	364	230	Novel-3h-5p	TCGGAAATTCTGTTTCTTTGT	21	2	0	0	0	2	Novel-3h-3p	AAAGAAACAGAACTTCCGGAGG	22	339	57	81	111	90
novel-3h-3	GL430185_952208_952446_-	InterGenic		3prime	20	903						903	143	187	344	229									Novel-3h-3p	AAAGAAACAGAACTTCCGGAGG	22	339	57	81	111	90
novel-40	GL430644_69734_69881_-	InterGenic		Both	33	18433	15837	2799	1230	7868	3940	2596	716	250	1063	567	Novel-40-5p	GTGAAGAGACATGAGAGGT	19	3227	559	222	1879	567	Novel-40-3p	ACTCTGATCGTTTTTTCACTG	21	328	72	20	177	59
novel-41	GL432224_2014_2078_+	Exon-InterGenic	ENSMLUG00000027107	3prime	39	20285						20285	4203	3031	5458	7593									Novel-41-3p	AGAGGATGCATTCTGAGTGG	20	3204	394	307	1064	1439
novel-42-1	GL430644_68945_69054_-	InterGenic		3prime	4	300						300	69	30	93	108									Novel-42-3p	GGGGTCCGGTGCGGAGAG	18	199	52	23	66	58
novel-42-2	GL431894_25892_26001_-	InterGenic		3prime	4	300						300	69	30	93	108									Novel-42-3p	GGGGTCCGGTGCGGAGAG	18	199	52	23	66	58
novel-4a	GL429779_11165727_11165808_+	InterGenic		3prime	4	226						226	156	2	66	2									Novel-4a-3p	GATCGGGCCTAAACCGGCAGC	21	148	101	0	45	2
novel-4b-1	GL429834_3994878_3995011_-	InterGenic		3prime	5	2046						2046	1199	45	772	30									Novel-4b-3p	GATCGGGCCTAAACCGGCAGTT	22	1962	1157	36	747	22
novel-4b-2	GL429936_1388343_1388509_-	Intron	ENSMLUG00000016291	3prime	8	2146						2146	1281	50	783	32									Novel-4b-3p	GATCGGGCCTAAACCGGCAGTT	22	1962	1157	36	747	22
novel-4b-3	GL430026_229519_229641_+	InterGenic		3prime	5	2046						2046	1199	45	772	30									Novel-4b-3p	GATCGGGCCTAAACCGGCAGTT	22	1962	1157	36	747	22
novel-4c	GL429825_624665_624874_+	InterGenic		3prime	2	117						117	40	11	58	8									Novel-4c-3p	GATCGGGCCTAAACTGGCAGTA	22	112	40	11	53	8
novel-4d-1	GL429790_4926699_4926783_-	InterGenic		3prime	2	102						102	61	5	34	2									Novel-4d-3p	GATCGGGCCTAAACCGGCAAT	21	93	58	4	29	2
novel-4d-2	GL429948_1192697_1192934_+	InterGenic		3prime	5	184						184	109	15	51	9									Novel-4d-3p	GATCGGGCCTAAACCGGCAAT	21	93	58	4	29	2
novel-4d-3	GL432045_10572_10660_-	InterGenic		Both	6	187	3	0	2	0	1	184	109	15	51	9	Novel-4d-5p	TGACTGCCGGTTTAGGCCT	19	3	0	2	0	1	Novel-4d-3p	GATCGGGCCTAAACCGGCAAT	21	93	58	4	29	2
novel-5	GL430246_624590_624812_-	InterGenic		3prime	6	191						191	2	117	2	70									Novel-5-3p	AATATAACACAGATGGCCTATTT	23	146	2	96	2	46
novel-6-1	GL430768_78250_78319_-	InterGenic		3prime	15	614						614	71	62	211	270									Novel-6-3p	AGAAAAGGTGTTGGTTGAT	19	139	10	9	58	62
novel-6-2	GL431822_16587_16656_+	InterGenic		3prime	15	614						614	71	62	211	270									Novel-6-3p	AGAAAAGGTGTTGGTTGAT	19	139	10	9	58	62
novel-7	GL429825_5531547_5531757_+	InterGenic		3prime	14	8207						8207	1569	2235	1731	2672									Novel-7-3p	AGTGGTTAGGATTCGGCG	18	2296	417	548	513	818
novel-8a-1	GL429977_26549_26645_+	InterGenic		3prime	7	386						386	70	178	28	110									Novel-8a-3p	CTCGGCGCTGTCAGCGGGTGC	21	130	31	68	8	23
novel-8a-2	GL430008_1498422_1498532_+	InterGenic		3prime	5	362						362	68	166	27	101									Novel-8a-3p	CTCGGCGCTGTCAGCGGGTGC	21	130	31	68	8	23
novel-8b	GL429772_12613490_12613636_+	InterGenic		5prime	4	232	232	37	98	19	78						Novel-8b-5p	CTCGGCGCTGTCAGCGGGTG	20	119	20	45	15	39
novel-9	GL429830_1724495_1724727_+	InterGenic		5prime	10	257	257	41	32	171	13						Novel-9-5p	AGGAGGGAGCTGATCGATGT	20	126	20	5	99	2
