# Supplementary material for: Down but Not Out: The Role of MicroRNAs in Hibernating Bats
Source: PLoS One. 2015 Aug 5;10(8):e0135064. doi: 10.1371/journal.pone.0135064 (PMC4526555; doi:10.1371/journal.pone.0135064)
Supplement: S7 Table — (A) Expression details of 196 miRNAs (119 conserved miRNAs and 77 novel miRNAs). (B) List of 33 miRNAs differentially expressed in the brain (P≤0.01 & │logFC ≥1). (C) List of 25 miRNAs differentially expressed in adipose tissue (P≤0.01 & │logFC│≥1). (D) List of 9 miRNAs differentially expressed in both brain and adipose tissue (P≤0.01 & │logFC│≥1). (E) List of 31 tissue/state-specifically expressed miRNAs in brain (23) and adipose tissue (8). (XLSX) [file pone.0135064.s010.xlsx]

## Sheet: A
Name	Sequence	Length	Expression					Expression-TPM				HA vs AA				HB vs AB				Hairpin
			Total counts	AA	AB	HA	HB	AA	AB	HA	HB	logFC	logTPM	PValue	Mark	logFC	logTPM	PValue	Mark
miR-1-3p	TGGAATGTAAAGAAGTATGTAT	22	434480	202291	14019	196202	21968	24856.3	1929.25	26152.8	2530.01	1.07305	16.7309	0.104308	UP	0.788789	12.8496	0.23028	UP	mir-1-1|mir-1-2|
miR-10-5p	TACCCTGTAGATCCGAATTTGT	22	2819	1097	52	1655	15	134.793	7.156	220.604	1.728	1.7101	9.66334	0.0111601	UP	-1.63733	3.73414	0.0412252	DOWN	mir-10|
miR-10-3p	CAAATTCGTATCTAGGGGAA	20	2	2	0	0	0	0.246	0	0	0	0	0	1		0	0	1		mir-10|
miR-100-5p	AACCCGTAGATCCGATCTTGT	21	850873	297206	220756	111620	221291	36518.9	30379.8	14878.4	25485.7	-0.295727	16.5116	0.651092	DOWN	0.144272	16.4529	0.825268	UP	mir-100|
miR-100-3p	CAAGCTCGCTTCTATGGGTCT	21	179	73	43	21	42	8.97	5.918	2.799	4.837	-0.676316	4.38559	0.374649	DOWN	0.106209	4.10701	0.925514	UP	mir-100|
miR-101-3p	TACAGTACTGTGATAACTGAAG	22	20115	6753	3546	5448	4368	829.768	487.99	726.193	503.055	0.807307	11.6513	0.219964	UP	0.441533	10.6564	0.500839	UP	mir-101-1|mir-101-2|
miR-124-5p	CGTGTTCACAGCGGACCTTGA	21	354	0	143	0	211	0	19.679	0	24.3	0	0	1		0.700991	6.17911	0.305381	UP	mir-124-1|
miR-124a-3p	TAAGGCACGCGGTGAATG	18	866242	292	449967	286	415697	35.879	61923.1	38.122	47875.1	1.08629	7.29782	0.108197	UP	0.0264934	17.4196	0.967657	UP	mir-124a|
miR-124b-3p	TAAGGCACGCGGTGAATGCCAA	22	101576	50	62399	111	39016	6.144	8587.16	14.796	4493.4	2.25991	5.61905	0.00185373	UP	-0.536674	14.3126	0.412769	DOWN	mir-124b|
miR-125-3p	ACAAGTCAGGCTCTTGGGACCT	22	79	20	35	3	21	2.457	4.817	0.4	2.419	-1.57036	2.33386	0.183672	DOWN	-0.590707	3.4924	0.489124	DOWN	mir-125|
miR-129-3p	AAGCCCTTACCCCAAAAAGCAT	22	51577	2060	14360	1104	34053	253.12	1976.18	147.158	3921.82	0.217203	9.59165	0.741534	UP	1.38649	13.2904	0.0372131	UP	mir-129-1|mir-129-2|
miR-129-5p	CTTTTTGCGGTCTGGGCTTG	20	1183	124	594	89	376	15.236	81.745	11.863	43.303	0.637257	5.76875	0.360949	UP	-0.518674	7.60515	0.435779	DOWN	mir-129-1|mir-129-2|
miR-1298-5p	TTCATTCGGATGTCCAGATGT	21	646	0	238	0	408	0	32.753	0	46.989	0	0	1		0.91764	7.05209	0.173764	UP	mir-1298|
miR-1298-3p	CATCTGGGCAACTGATTGA	19	147	0	50	0	97	0	6.881	0	11.171	0	0	1		1.09282	4.91791	0.131259	UP	mir-1298|
miR-130-3p	CAGTGCAATGTTAAAAGGGCAT	22	4829	3108	221	1224	276	381.892	30.413	163.154	31.786	-0.227215	9.96365	0.729753	DOWN	0.460934	6.66338	0.491171	UP	mir-130|
miR-133-3p	TTGGTCCCCTTCAACCAGCTGT	22	428	331	9	84	4	40.671	1.239	11.197	0.461	-0.860013	6.4831	0.209189	DOWN	-0.987253	1.38665	0.390133	DOWN	mir-133-1|mir-133-2|
miR-135-3p	TGTAGGGATGGAAGCCATGAA	21	1857	2	1110	7	738	0.246	152.755	0.933	84.994	0	0	1		-0.447963	8.53659	0.497926	DOWN	mir-135|
miR-138-3p	GCTACTTCACAACACCAGGGT	21	123	4	49	0	70	0.491	6.743	0	8.062	0	0	1		0.652548	4.60388	0.389814	UP	mir-138|
miR-139-3p	TGGAGACGCGGCCCTGTTGGAGT	23	3183	912	1430	545	296	112.061	196.792	72.646	34.09	0.374239	8.50196	0.57273	UP	-2.13067	8.40572	0.00191619	DOWN	mir-139|
miR-140-3p	ACCACAGGGTAGAACCACGGA	21	188492	48359	42597	49098	48438	5942.06	5862.07	6544.53	5578.52	1.13901	14.7114	0.0851293	UP	0.326166	14.1776	0.61804	UP	mir-140|
miR-142-5p	CCCATAAAGTAGAAAGCACT	20	2048	895	59	958	136	109.972	8.119	127.697	15.663	1.21496	9.0063	0.0683479	UP	1.34172	5.33098	0.0567454	UP	mir-142|
miR-142-3p	GTAGTGTTTCCTACTTTATGGA	22	58	37	1	18	2	4.546	0.138	2.399	0.23	0.0769196	3.71536	0.942485	UP	0	0	1		mir-142|
miR-145-3p	ATTCCTGGAAATACTGTTCT	20	420	173	7	218	22	21.257	0.963	29.058	2.534	1.44889	6.79422	0.0346817	UP	1.75532	2.57705	0.074136	UP	mir-145|
miR-1468-5p	CTCCGTTTGCCTGTTTTGCT	20	590	408	19	141	22	50.133	2.615	18.795	2.534	-0.41533	6.95351	0.542026	DOWN	0.348024	3.05884	0.723661	UP	mir-1468|
miR-1468-3p	GAAAAATAAGCAAATGGAAA	20	3	2	0	0	1	0.246	0	0	0.115	0	0	1		0	0	1		mir-1468|
miR-148-3p	TCAGTGCATCACAGAACTTTGT	22	4182	1129	1159	944	950	138.725	159.498	125.831	109.41	0.858758	9.10259	0.194291	UP	-0.146066	8.73434	0.82557	DOWN	mir-148|
miR-151-3p	CTAGACTGAAGCTCCTTGAGGA	22	5806	1860	1529	1297	1120	228.546	210.416	172.884	128.988	0.596927	9.66033	0.364746	UP	-0.30825	9.05934	0.639824	DOWN	mir-151|
miR-153-5p	GTCATTTTTGTGGCGTTGCAG	21	271	0	107	0	164	0	14.725	0	18.888	0	0	1		0.755425	5.79459	0.275634	UP	mir-153|
miR-153-3p	TTGCATAGTCACAAAAGTGATCA	23	190	0	92	0	98	0	12.661	0	11.286	0	0	1		0.231319	5.27049	0.757802	UP	mir-153|
miR-154-3p	AATCATACATGGTAGACCTGTTT	23	14220	115	7011	117	6977	14.131	964.833	15.596	803.529	1.13967	5.98136	0.104457	UP	0.133762	11.4707	0.838154	UP	mir-154|
miR-16-5p	TAGCAGCACGTAAATATTGGCG	22	19161	10813	1138	6453	757	1328.64	156.608	860.155	87.182	0.372405	12.0694	0.569583	UP	-0.447234	8.57283	0.498183	DOWN	mir-16-1|mir-16-2|
miR-16-1-3p	CCAGTATTAACTGTGCTGCTGA	22	8	2	1	1	4	0.246	0.138	0.133	0.461	0	0	1		0	0	1		mir-16-1|
miR-16-2-3p	ACCAATATTATTGTGCTGCTTT	22	5	3	0	2	0	0.369	0	0.267	0	0	0	1		0	0	1		mir-16-2|
miR-181a-3p	ACCACCGACCGTTGACTGTACC	22	181	40	69	12	60	4.915	9.496	1.6	6.91	-0.613272	3.55132	0.511408	DOWN	-0.0606183	4.70546	0.949201	DOWN	mir-181a|
miR-181b-3p	ACCATCGACCGTTGAGTGGAC	21	51	1	13	2	35	0.123	1.789	0.267	4.031	0	0	1		1.55059	3.3056	0.0558668	UP	mir-181b-1|mir-181b-2|
miR-181c-3p	ACCATCGACCGTTGATTGTAC	21	248	13	81	0	154	1.597	11.147	0	17.736	-5.28489	1.48652	0.0140787	DOWN	1.06528	5.59522	0.124358	UP	mir-181c|
miR-185-5p	AGGGGCTGGCTTTCCTCT	18	2633	457	1178	218	780	56.153	162.113	29.058	89.831	0.0492383	7.3314	0.945058	UP	-0.453894	8.61986	0.491558	DOWN	mir-185|
miR-193-3p	AACTGGCCCACAAAGTCCCGCT	22	665	541	5	106	13	66.475	0.688	14.129	1.497	-1.23319	7.06967	0.0707127	DOWN	1.47171	1.88189	0.183672	UP	mir-193|
miR-199-3p	ACAGTAGTCTGCACATTGGTT	21	629182	458628	8024	156158	6372	56353.4	1104.24	20815.1	733.852	-0.437177	17.0757	0.504199	DOWN	-0.191788	11.5042	0.769562	DOWN	mir-199|
miR-199-5p	CCCAGTGTTCAGACTACCT	19	1468	988	22	442	16	121.399	3.028	58.917	1.843	-0.0433088	8.3978	0.949763	DOWN	-0.314458	2.9384	0.77773	DOWN	mir-199|
miR-200a-3p	TAACACTGTCTGGTAACGATGTT	23	334	0	204	30	100	0	28.074	3.999	11.517	7.57856	3.2895	2.45054e-06	UP	-0.886215	5.92392	0.198679	DOWN	mir-200a|
miR-200b-3p	TAATACTGCCGGGTAATGATGG	22	420	28	99	269	24	3.44	13.624	35.856	2.764	4.36457	6.70261	3.0845e-08	UP	-1.8932	4.60373	0.0113473	DOWN	mir-200b|
miR-206-3p	TGGAATGTAAGGAAGTGTGTGG	22	14543	6139	2031	4662	1711	754.323	279.5	621.423	197.053	0.720054	11.4588	0.273409	UP	-0.106556	9.56253	0.871725	DOWN	mir-206|
miR-218a-5p	TTGTGCTTGATCTAACCATGT	21	583	23	219	11	330	2.826	30.138	1.466	38.006	0.052247	3.01715	1	UP	0.731629	6.81315	0.280473	UP	mir-218a|
miR-218a-3p	CATGGTTCCGTCAAGCACCAT	21	2	1	0	0	1	0.123	0	0	0.115	0	0	1		0	0	1		mir-218a|
miR-218b-5p	TTGTGCTTGATCTAACCAT	19	250	7	78	1	164	0.86	10.734	0.133	18.888	0	0	1		1.21018	5.64049	0.0817628	UP	mir-218b|
miR-218b-3p	ATGGTTCTGTCAAGCACCG	19	6	0	2	0	4	0	0.275	0	0.461	0	0	1		0	0	1		mir-218b|
miR-219-3p	AGAATTGTGGCTGGACATCT	20	89179	18	49302	12	39847	2.212	6784.79	1.6	4589.11	0.52385	2.8893	0.638759	UP	-0.166394	14.1354	0.799073	DOWN	mir-219|
miR-219-5p	TGATTGTCCAAACGCAATTC	20	2563	6	894	0	1663	0.737	123.03	0	191.525	0	0	1		1.03601	9.04	0.118197	UP	mir-219|
miR-22-3p	AAGCTGCCAGTTGAAGAACTGT	22	23462	10259	1419	9822	1962	1260.56	195.279	1309.23	225.96	1.05431	12.4166	0.110557	UP	0.608139	9.43335	0.355717	UP	mir-22|
miR-221-5p	ACCTGGCATACAATGTAG	18	437	51	120	19	247	6.267	16.514	2.533	28.447	-0.305076	4.01199	0.713639	DOWN	1.1805	6.24133	0.0844975	UP	mir-221|
miR-221-3p	CTACATTGTCTGCTGGGTTT	20	6	2	0	2	2	0.246	0	0.267	0.23	0	0	1		0	0	1		mir-221|
miR-222-3p	AGCTACATCTGGCTACTGGGTC	22	12491	2639	5218	3277	1357	324.264	718.086	436.809	156.283	1.42941	10.7208	0.0321579	UP	-1.80212	10.3399	0.00754248	DOWN	mir-222|
miR-222-5p	GGCTCAGTAGTCAGTGTA	18	290	35	24	133	98	4.301	3.303	17.728	11.286	3.03081	5.76977	5.79538e-05	UP	2.15835	4.66554	0.00440988	UP	mir-222|
miR-24-3p	TGGCTCAGTTCAGCAGGAACAG	22	4582	1670	1031	1290	591	205.199	141.883	171.951	68.064	0.744544	9.59534	0.25912	UP	-0.66182	8.34349	0.318076	DOWN	mir-24|
miR-28-3p	CACTAGATTGTGAGCTCCTGGA	22	6634	3436	753	2141	304	422.195	103.626	285.385	35.011	0.434658	10.4507	0.507901	UP	-1.16717	7.71503	0.0814639	DOWN	mir-28|
miR-28-5p	CAAGGAGCTCACAGTCTATT	20	1	0	0	0	1	0	0	0	0.115	0	0	1		0	0	1		mir-28|
miR-285-3p	TAGCACCATTTGAAATCAGT	20	45462	6497	11475	5558	21932	798.312	1579.15	740.856	2525.87	0.891898	11.6499	0.175951	UP	1.07531	12.7486	0.103715	UP	mir-285-1|mir-285-2|
miR-285-1-5p	GCTGGTTTCATATGGTGG	18	1	0	0	0	1	0	0	0	0.115	0	0	1		0	0	1		mir-285-1|
miR-285-2-5p	GCTGGTTTCACATGGTGGCTT	21	26	0	9	8	9	0	1.239	1.066	1.037	0	0	1		0.136978	1.86707	1	UP	mir-285-2|
miR-29-3p	TAGCACCATCTGAAATCGGTTA	22	1946308	357670	416098	373410	799130	43948.3	57262.2	49773.8	92034.4	1.17927	17.626	0.074889	UP	1.08229	17.9337	0.101416	UP	mir-29|
miR-29-5p	ACTGATTTCTTTTGGTGTTCA	21	276	53	108	32	83	6.512	14.863	4.265	9.559	0.38703	4.39154	0.631943	UP	-0.238438	5.2677	0.739802	DOWN	mir-29|
miR-30a-3p	CTGGGAGAGGGTTGTTTACTC	21	217	58	84	21	54	7.127	11.56	2.799	6.219	-0.346212	4.17982	0.696416	DOWN	-0.494806	4.79363	0.505236	DOWN	mir-30a|
miR-30b-3p	TGGGAGAAGGCTGTTTACTC	20	805	351	111	228	115	43.129	15.275	30.391	13.244	0.494295	7.19131	0.463928	UP	0.191431	5.51999	0.793823	UP	mir-30b|
miR-30c-3p	CTTTCAGTCGGATGTTTGCAG	21	3271	1182	542	1113	434	145.237	74.588	148.358	49.983	1.03015	9.2815	0.120622	UP	-0.179725	7.62197	0.790539	DOWN	mir-30c|
miR-30d-3p	CTTTCAGTCAGATGTTTGCTAC	22	83	28	26	16	13	3.44	3.578	2.133	1.497	0.306415	3.42194	0.795106	UP	-0.847542	2.96765	0.351957	DOWN	mir-30d|
miR-3135-5p	GGCTGGTCCGAGTGCAGT	18	6682	4874	808	361	639	598.888	111.195	48.12	73.592	-2.63737	9.93878	0.00015531	DOWN	-0.19769	8.18963	0.765211	DOWN	mir-3135|
miR-361-5p	TTATCAGAATCTCCAGGGG	19	110	41	22	11	36	5.038	3.028	1.466	4.146	-0.772427	3.53459	0.410207	DOWN	0.843681	3.56866	0.293828	UP	mir-361|
miR-363-3p	AATTGCACGGTATCCATCT	19	590	66	210	134	180	8.11	28.9	17.862	20.73	2.13307	5.92111	0.00287447	UP	-0.0815074	6.30096	0.91182	DOWN	mir-363|
miR-365-3p	TAATGCCCCTAAAAATCCTTAT	22	947	598	7	330	12	73.479	0.963	43.987	1.382	0.259325	7.82923	0.698318	UP	0.89365	1.95414	0.431875	UP	mir-365|
miR-365-5p	AAGGGACTTTCAGGGGCAGC	20	224	113	3	108	0	13.885	0.413	14.396	0	1.04959	5.89493	0.13085	UP	0	0	1		mir-365|
miR-378-3p	ACTGGACTTGGAGTCAGAAGGC	22	198036	180178	4624	11775	1459	22139.2	636.341	1569.55	168.03	-2.81847	15.1212	5.51242e-05	DOWN	-1.52323	10.2326	0.0228152	DOWN	mir-378|
miR-381-5p	AGCGAGGTTGCCCTTTGTAT	20	1809	88	801	18	902	10.813	110.231	2.399	103.882	-1.16538	4.49951	0.13149	DOWN	0.312014	8.43689	0.637457	UP	mir-381|
miR-381-3p	TATACAAGGGCAAGCTCTCT	20	1600	140	608	46	806	17.202	83.671	6.132	92.826	-0.487163	5.3867	0.503699	DOWN	0.547292	8.17415	0.408858	UP	mir-381|
miR-383-5p	CAGATCAGAAGGTGATTG	18	2589	3	894	2	1690	0.369	123.03	0.267	194.634	0	0	1		1.05924	9.05566	0.11041	UP	mir-383|
miR-383-3p	ACAGCACTACCTGGTCAGAAA	21	2	0	2	0	0	0	0.275	0	0	0	0	1		0	0	1		mir-383|
miR-3958-3p	AGATATTGCACGGTTGATCT	20	564017	11177	226127	6683	320030	1373.36	31118.9	890.813	36857.3	0.375165	12.1187	0.566719	UP	0.641854	16.7699	0.327832	UP	mir-3954|
miR-3958-5p	AGGTTGTCCGTGATGTATTTGC	22	9	0	2	0	7	0	0.275	0	0.806	0	0	1		0	0	1		mir-3954|
miR-432-5p	TCTTGGAGTAGGTCATTGGG	20	8177	1014	4927	188	2048	124.594	678.039	25.06	235.865	-1.31339	7.94923	0.0518459	DOWN	-1.12562	10.4377	0.0893333	DOWN	mir-432|
miR-432-3p	CTGGATGGCTCCTCCATGTCT	21	12	0	4	0	8	0	0.55	0	0.921	0	0	1		1.09145	1.29057	0.497906	UP	mir-432|
miR-448-3p	TTGCATATGTAGGATGTCCCA	21	8783	739	4138	77	3829	90.804	569.459	10.264	440.979	-2.14322	7.30544	0.00225354	DOWN	0.0288125	10.656	0.965304	UP	mir-448|
miR-448-5p	AACATCCTGCATAGTGCTGCCA	22	8	0	5	0	3	0	0.688	0	0.346	0	0	1		0	0	1		mir-448|
miR-455-3p	GCAGTCCATGGGCATATACAC	21	1010	535	201	65	209	65.738	27.661	8.664	24.07	-1.92131	6.88537	0.00615576	DOWN	0.196848	6.37958	0.776182	UP	mir-455|
miR-485-3p	GTCATACACGGCTCTCCTCTCT	22	13679	532	9794	173	3180	65.369	1347.82	23.06	366.235	-0.503126	7.29928	0.455539	DOWN	-1.48202	11.326	0.0264305	DOWN	mir-485|
miR-486-5p	TCCTGTACTGAGCTGCCCCGA	21	4033	1763	326	1795	149	216.627	44.863	239.265	17.16	1.14294	9.93542	0.0850143	UP	-0.987638	6.56524	0.146344	DOWN	mir-486|
miR-486-3p	CGGGGCAGCTCAGTACAGGATG	22	809	365	238	151	55	44.849	32.753	20.128	6.334	-0.156053	6.90782	0.825439	DOWN	-1.96804	5.85183	0.00562275	DOWN	mir-486|
miR-503-5p	TAGCAGCGGGAACAGTACT	19	4313	1713	146	2209	245	210.483	20.092	294.449	28.216	1.48382	10.1368	0.0264863	UP	0.886405	6.32666	0.193262	UP	mir-503|
miR-503-3p	GGAGTATTGTTTCTGCTGCCCGG	23	8	4	0	3	1	0.491	0	0.4	0.115	0	0	1		0	0	1		mir-503|
miR-532-3p	CCTCCCACACCCAAGGCTTGCA	22	835	333	189	201	112	40.917	26.01	26.792	12.899	0.388464	7.05482	0.56504	UP	-0.613047	5.91539	0.376702	DOWN	mir-532|
miR-539-5p	GGAGAAATTATCCTTGGTGTGC	22	90	2	54	3	31	0.246	7.431	0.4	3.57	0	0	1		-0.655873	4.09222	0.41793	DOWN	mir-539|
miR-539-3p	CATACAAGGACAATTTCTTTTT	22	64	0	37	2	25	0	5.092	0.267	2.879	0	0	1		-0.421345	3.64199	0.614163	DOWN	mir-539|
miR-544-5p	TCTTGTTAAAAGGCAGATTCT	21	1507	22	550	6	929	2.703	75.689	0.8	106.991	-0.742153	2.66277	0.494712	DOWN	0.896709	8.24699	0.17765	UP	mir-544|
miR-551-3p	GCGACCCATACTTGGTTTCAG	21	189	0	63	0	126	0	8.67	0	14.511	0	0	1		1.13751	5.28195	0.108216	UP	mir-551|
miR-574a-5p	TGAGTGTGTGTGTGTGAGT	19	400	338	31	27	4	41.531	4.266	3.599	0.461	-2.52191	6.12924	0.000632548	DOWN	-2.74225	2.79231	0.00396476	DOWN	mir-574a|
miR-574b-5p	TGAGTGTGTGTGTGTGAG	18	153	130	19	3	1	15.974	2.615	0.4	0.115	-4.25011	4.64765	1.3156e-05	DOWN	-3.81913	1.98747	0.00304285	DOWN	mir-574b-1|mir-574b-2|
miR-590-3p	TAATTTTATGTATAAGCTAGT	21	136	55	7	33	41	6.758	0.963	4.399	4.722	0.378107	4.44059	0.639255	UP	2.64627	3.31792	0.00353459	UP	mir-590|
miR-6119-3p	CAAATCATTTTTTACTCTCCA	21	118	79	14	20	5	9.707	1.927	2.666	0.576	-0.859612	4.43705	0.269623	DOWN	-1.30438	1.92887	0.228158	DOWN	mir-6119|
miR-744-5p	GCGGGGCTAGGGCTAACAGCA	21	436	47	149	54	186	5.775	20.505	7.198	21.421	1.31118	4.79141	0.0702863	UP	0.460078	6.09409	0.505472	UP	mir-744|
miR-744-3p	CTGTTGCCACTAACCTCAACCT	22	2	0	2	0	0	0	0.275	0	0	0	0	1		0	0	1		mir-744|
miR-7a-5p	TGAGGTAGTAAGTTGTATTGT	21	1540	246	538	107	649	30.227	74.038	14.263	74.744	-0.0837869	6.37293	0.915954	DOWN	0.411218	7.91845	0.535352	UP	mir-7a|
miR-7a-3p	CTATACAACTTACTACTTT	19	2	2	0	0	0	0.246	0	0	0	0	0	1		0	0	1		mir-7a|
miR-7b-5p	TGAGGTAGTAGGTTGTATGGTT	22	702587	249770	200325	118816	133676	30690.2	27568.1	15837.6	15395.2	0.0452695	16.4239	0.944769	UP	-0.442821	16.0343	0.498738	DOWN	mir-7b|
miR-7b-3p	CTGTACAACCTTCTAGCTTTCC	22	10	2	4	0	4	0.246	0.55	0	0.461	0	0	1		0	0	1		mir-7b|
miR-7c-5p	TGGAAGACTAGTGATTTT	18	32436	325	10140	983	20988	39.934	1395.44	131.029	2417.15	2.71261	8.72864	0.000111609	UP	1.19027	12.6492	0.0723922	UP	mir-7c|
miR-7c-3p	CAACAAATCACAGTCTGCCATA	22	562	102	211	36	213	12.533	29.037	4.799	24.531	-0.383883	4.97385	0.613601	DOWN	0.154209	6.42703	0.823093	UP	mir-7c|
miR-7d-5p	TGAGGTAGTAGGTTGTATAGTT	22	1288513	366251	364795	312837	244630	45002.7	50202	41699.7	28173.6	0.889718	17.4657	0.176562	UP	-0.435704	16.9021	0.505629	DOWN	mir-7d|
miR-7d-3p	CTATACAATCTACTGTCTTT	20	25	5	6	3	11	0.614	0.826	0.4	1.267	0	0	1		0.984403	1.79407	0.394643	UP	mir-7d|
miR-7e-5p	TGAGGTAGTAGATTGTATAGTT	22	325423	84535	84358	83869	72661	10387.1	11609.1	11179.3	8368.24	1.10573	15.4943	0.0944058	UP	-0.0745631	14.9543	0.909166	DOWN	mir-7e|
miR-7e-3p	CTATACAATCTATTGCCTTC	20	8	8	0	0	0	0.983	0	0	0	0	0	1		0	0	1		mir-7e|
miR-7f-5p	AGAGGTAGTAGGTTGCATAGTT	22	227183	36531	134582	22072	33998	4488.71	18520.8	2942.09	3915.49	0.390234	13.8359	0.551009	UP	-1.84418	15.0194	0.00622658	DOWN	mir-7f|
miR-7f-3p	TATACGACCTGCTGCCTTTCT	21	25	9	14	1	1	1.106	1.927	0.133	0.115	-1.89528	1.16655	0.372947	DOWN	-3.38555	1.57776	0.0141459	DOWN	mir-7f|
miR-7g-5p	TGAGGTAGTAGTTTGTACAGTT	22	53538	14568	15388	11519	12063	1790.03	2117.65	1535.43	1389.27	0.778339	12.7422	0.2365	UP	-0.210433	12.435	0.747691	DOWN	mir-7g|
miR-7g-3p	CTGTACAGGCCACTGCCTTG	20	1	0	0	0	1	0	0	0	0.115	0	0	1		0	0	1		mir-7g|
miR-873-3p	GAGACTGACGAGTTCCCGGGAA	22	83	0	47	0	36	0	6.468	0	4.146	0	0	1		-0.24241	4.06579	0.774231	DOWN	mir-873|
miR-876-5p	TGGATTTCTTTGTGAATCACC	21	55	0	19	0	36	0	2.615	0	4.146	0	0	1		1.0525	3.49531	0.188387	UP	mir-876|
miR-876-3p	GTGGTTTACAAAGTAATTCA	20	12	0	2	0	10	0	0.275	0	1.152	0	0	1		2.3189	1.29939	0.0999758	UP	mir-876|
miR-9-3p	TAAAGCTAGATAACCGAAAGTA	22	5002	11	2918	3	2070	1.352	401.566	0.4	238.398	-0.727586	1.68437	0.670342	DOWN	-0.354533	9.97122	0.589179	DOWN	mir-9|
miR-92a-3p	TATTGCACTTGTCCCGGCCTGT	22	3072	1767	363	767	175	217.118	49.955	102.238	20.154	-0.0868456	9.21526	0.896326	DOWN	-0.910917	6.7464	0.177675	DOWN	mir-92a-1|mir-92a-2|
miR-92b-3p	TATTGCACTCGTCCCGGCCT	20	9041	37	4929	127	3948	4.546	678.314	16.929	454.684	2.88488	5.71959	0.000108099	UP	-0.179383	10.807	0.784329	DOWN	mir-92b|
Novel-10-3p	GGGGCACGCCGGCCTTGCGG	20	111	11	1	96	3	1.352	0.138	12.796	0.346	3.0164	12.8481	0.000183788	UP	-4.42728	12.2755	4.44892e-06	DOWN	novel-10-1|novel-10-2|
Novel-10-5p	AGTGGGAGGCCCCCGGCGCC	20	2	0	0	2	0	0	0	0.267	0	0	0	1	_	0	0	1	_	novel-10-1|novel-10-2|
Novel-11-3p	CAAGCTCGCTTCTATGGGTCTGT	23	108	51	24	19	14	6.267	3.303	2.533	1.612	-1.49344	12.2778	0.0540956	DOWN	0.0388674	10.855	1	UP	novel-11|
Novel-12-3p	GTTAATAATGCGGATTTTG	19	105	37	13	29	26	4.546	1.789	3.866	2.994	-0.429652	12.1822	0.596551	DOWN	0.31961	11.6096	0.679362	UP	novel-12|
Novel-13-3p	TACGGCCAAGCACCCGCAGGG	21	97	10	56	16	15	1.229	7.707	2.133	1.728	0.584967	10.8289	0.521385	UP	0.380839	10.7823	0.656347	UP	novel-13|
Novel-14-3p	AAATTTCTGGAGGATGAG	18	97	31	1	63	2	3.809	0.138	8.398	0.23	0.936227	12.6772	0.218709	UP	-4.36065	11.6837	3.70145e-05	DOWN	novel-14-1|novel-14-2|novel-14-3|
Novel-15-3p	TAGAAACGTCCAGAGGCACCG	21	1669	38	1067	5	559	4.669	146.837	0.666	64.379	-2.94434	11.5815	0.00182225	DOWN	7.20367	15.1975	3.13632e-14	UP	novel-15|
Novel-16-3p	GCCGACAGGCGGGCAGGACCAG	22	87	49	25	10	3	6.021	3.44	1.333	0.346	-2.34477	12.0367	0.00620187	DOWN	-1.20128	9.4738	0.390133	DOWN	novel-16|
Novel-16-5p	TGGCCTGCCCGCCAGTCGG	19	2	2	0	0	0	0.246	0	0	0	0	0	1	_	0	0	1	_	novel-16|
Novel-17-3p	CGAGGACCATCGGTTGGCGACT	22	81	57	6	12	6	7.004	0.826	1.6	0.691	-2.30495	12.2631	0.00525962	DOWN	-0.505216	9.95935	0.725047	DOWN	novel-17|
Novel-18a-3p	TGACTATCTAGAGGAAGTA	19	1471	282	144	222	823	34.65	19.817	29.592	94.783	-0.426178	15.1162	0.529925	DOWN	2.36884	16.0056	0.000663364	UP	novel-18a|
Novel-18b-3p	TGACTATCTAGAGGAAGT	18	344	79	51	41	173	9.707	7.018	5.465	19.924	-1.02311	13.052	0.165678	DOWN	2.54863	13.7162	0.000468531	UP	novel-18b|
Novel-18b-5p	TACCGATTGGATGGTTTA	18	259	81	31	55	92	9.953	4.266	7.331	10.595	-0.637553	13.2284	0.374404	DOWN	1.21788	13.0956	0.0875979	UP	novel-18b|
Novel-19-3p	TTTCCGGAGGATGAGGCCCAGT	22	78	28	29	14	7	3.44	3.991	1.866	0.806	-1.06768	11.5354	0.226004	DOWN	-0.507272	10.1801	0.63922	DOWN	novel-19|
Novel-1a-3p	TGATCAGCCGTTGCCTCTCTCT	22	164	99	28	30	7	12.165	3.853	3.999	0.806	-1.79516	13.1641	0.0148112	DOWN	-1.59104	10.9458	0.0946183	DOWN	novel-1a-1|novel-1a-2|novel-1a-3|
Novel-1a-5p	AGAGAGAGGCAGGGTCTGAT	20	2	0	1	1	0	0	0.138	0.133	0	0	0	1	_	0	0	1	_	novel-1a-2|novel-1a-3|
Novel-1b-3p	TGATCAGCCGTTGCCTCTCT	20	121	89	7	19	6	10.936	0.963	2.533	0.691	-2.29382	12.9112	0.00268673	DOWN	-1.15553	10.4048	0.253153	DOWN	novel-1b-1|novel-1b-2|
Novel-1c-3p	TGATCAGCCGTTGCCTCTCTC	21	57	34	10	9	4	4.178	1.376	1.2	0.461	-1.96865	11.5763	0.0264292	DOWN	-0.662434	9.4883	0.670342	DOWN	novel-1c-1|novel-1c-2|novel-1c-3|
Novel-20-5p	AGGGGATGTCCAACTGTCAGTT	22	77	15	35	14	13	1.843	4.817	1.866	1.497	-0.177935	10.9926	1	DOWN	0.366398	10.5813	0.804303	UP	novel-20-1|novel-20-2|novel-20-3|
Novel-21-3p	CCCGGCGGGGAAGGTGGCT	19	1424	122	234	707	361	14.991	32.202	94.24	41.576	2.45101	15.8012	0.000491436	UP	-0.489444	15.8307	0.462893	DOWN	novel-21|
Novel-21-5p	GGCGACCGGCCGCCGCCGG	19	4	0	1	3	0	0	0.138	0.4	0	0	0	1	_	0	0	1	_	novel-21|
Novel-22-3p	TTGACCAAAGAATAGACCTCCT	22	71	0	36	0	35	0	4.954	0	4.031	0	0	1	_	7.39775	11.1141	2.45054e-06	UP	novel-22|
Novel-23-3p	GTGAAGCGTTCCATATTTTT	20	71	8	24	17	22	0.983	3.303	2.266	2.534	0.984486	10.7695	0.285115	UP	0.841119	11.1407	0.315146	UP	novel-23|
Novel-24-3p	TGGATACCGCAGCTAGGAAT	20	58	9	7	15	27	1.106	0.963	1.999	3.11	0.641583	10.7132	0.494712	UP	1.3114	11.2742	0.101443	UP	novel-24-1|novel-24-2|novel-24-3|
Novel-24-5p	GATGCTCTTAGCTGAGTG	18	21	9	4	1	7	1.106	0.55	0.133	0.806	-2.95977	9.46633	0.0577711	DOWN	0	0	1	_	novel-24-1|novel-24-2|novel-24-3|
Novel-25a-5p	GCGTTGGTGGTATAGTGGTGAG	22	1088	225	97	713	53	27.647	13.349	95.04	6.104	1.58147	15.9868	0.0200239	UP	-3.26473	15.2142	8.67452e-06	DOWN	novel-25a-1|novel-25a-2|novel-25a-3|
Novel-25b-5p	GCGTTGGTGGTATAGTGG	18	994	291	62	504	137	35.756	8.532	67.181	15.778	0.710467	15.7584	0.286546	UP	-1.39786	15.0331	0.0400359	DOWN	novel-25b|
Novel-26-5p	AGAGAGGCAGGGTCTGATCCA	21	53	30	4	14	5	3.686	0.55	1.866	0.576	-1.16639	11.6035	0.181118	DOWN	-0.976081	10.0203	0.394643	DOWN	novel-26-1|novel-26-2|novel-26-3|
Novel-27-3p	ACAGGATGTGAAGTACAGCT	20	52	1	25	2	24	0.123	3.44	0.267	2.764	0	0	1	_	3.88138	10.6461	0.000243817	UP	novel-27|
Novel-28-5p	AGGATGTCCGACTGACGGCTTA	22	50	6	2	40	2	0.737	0.275	5.332	0.23	2.60747	11.6365	0.00349079	UP	-3.70911	11.0779	0.000814859	DOWN	novel-28-1|novel-28-2|novel-28-3|novel-28-4|
Novel-28-3p	TAAGCCGGCAGTCAGACA	18	10	1	1	8	0	0.123	0.138	1.066	0	0	0	1	_	0	0	1	_	novel-28-4|
Novel-29-5p	AAGGATGTCCGACTGACGGCT	21	50	14	3	32	1	1.72	0.413	4.265	0.115	1.0979	11.6464	0.181118	UP	-4.25948	10.7354	0.000243817	DOWN	novel-29-1|novel-29-2|novel-29-3|
Novel-29-3p	AAGCCGGCAGTCAGACATCCCC	22	22	17	1	3	1	2.089	0.138	0.4	0.115	-2.48583	10.4699	0.0297218	DOWN	0	0	1	_	novel-29-2|
Novel-2a-3p	AAGCCGGCAGTCAGACATC	19	157	48	4	89	16	5.898	0.55	11.863	1.843	0.806179	13.2215	0.253967	UP	-1.98171	12.4117	0.0100787	DOWN	novel-2a-1|novel-28-3|novel-2a-3|
Novel-2a-1-5p	ATGTCCGACTGACGGCTTAGG	21	38	2	2	24	10	0.246	0.275	3.199	1.152	3.35347	10.8147	0.00281198	UP	-0.770595	10.8584	0.445397	DOWN	novel-2a-1|
Novel-2a-2-5p	GGATGTCCGACTGCCGGCTTA	21	12	7	0	5	0	0.86	0	0.666	0	-0.54379	9.72108	0.822492	DOWN	0	0	1	_	novel-2a-3|
Novel-2b-3p	AAGCCGGCAGTCAGACATCC	20	154	71	6	61	16	8.724	0.826	8.131	1.843	-0.29934	13.1812	0.684618	DOWN	-1.43888	11.9932	0.0663129	DOWN	novel-38-1|novel-2b-2|novel-2b-3|novel-2b-4|
Novel-30-3p	CCTCGACACAAGGGTTTGT	19	947	261	100	202	384	32.07	13.762	26.926	44.225	-0.450671	14.9941	0.505745	DOWN	1.40548	15.1118	0.0388027	UP	novel-30|
Novel-31-3p	AACGTAGAGGAAATTCCACCTT	22	910	48	385	12	465	5.898	52.983	1.6	53.553	-2.05817	12.0592	0.0145875	DOWN	5.72221	14.948	2.82946e-11	UP	novel-31|
Novel-31-5p	AAGGCGGATATTCCTTCTATGT	22	3	0	0	0	3	0	0	0	0.346	0	0	1	_	0	0	1	_	novel-31|
Novel-32-3p	TGTGGCGGAGTTGGTGAC	18	649	118	340	25	166	14.499	46.79	3.332	19.118	-2.30846	13.3171	0.00203442	DOWN	3.19632	13.5749	3.13017e-05	UP	novel-32|
Novel-33-3p	AAAGTCAGCCCTCGACACA	19	343	76	50	82	135	9.338	6.881	10.93	15.548	0.0280664	13.4366	0.978991	UP	1.19641	13.6592	0.0861287	UP	novel-33|
Novel-34-3p	AGGAGTGTGTAACAACTC	18	329	48	29	31	221	5.898	3.991	4.132	25.452	-0.707605	12.4448	0.363648	DOWN	3.30161	13.9817	1.3293e-05	UP	novel-34|
Novel-35-5p	GGAATCCGACTGTTTAAT	18	323	69	19	121	114	8.478	2.615	16.129	13.129	0.726861	13.6939	0.300028	UP	0.393226	13.7153	0.565232	UP	novel-35|
Novel-36-3p	GCTACTCAGGGGACATTT	18	309	12	64	36	197	1.474	8.807	4.799	22.688	1.48484	11.7045	0.070754	UP	2.92206	13.855	8.30011e-05	UP	novel-36|
Novel-37-3p	TAGGAGCAGTGATAGGTAATAT	22	3841	103	2413	26	1299	12.656	332.07	3.466	149.604	-2.05674	13.1663	0.00569548	DOWN	6.10694	16.4293	4.24616e-13	UP	novel-37|
Novel-38-5p	CAGGGGATGTCCGACTGCT	19	238	136	14	80	8	16.711	1.927	10.664	0.921	-0.844951	13.8987	0.228221	DOWN	-2.80997	12.135	0.000964113	DOWN	novel-38-1|novel-38-2|novel-38-3|
Novel-38-1-3p	TAAGCCAGCAGTCAGACATCCC	22	7	6	0	0	1	0.737	0	0	0.115	0	0	1	_	0	0	1	_	novel-38-3|
Novel-38-2-3p	AAGCTGGCAGTCGGACATCC	20	8	5	0	2	1	0.614	0	0.267	0.115	0	0	1	_	0	0	1	_	novel-38-2|
Novel-39-5p	GAACTTGACTATCTAGAGGA	20	215	65	11	85	54	7.987	1.514	11.33	6.219	0.304528	13.3582	0.677583	UP	-0.173843	12.9152	0.831828	DOWN	novel-39|
Novel-3a-3p	AAAGACACAGAATTTCCGGAGG	22	154	36	42	33	43	4.423	5.78	4.399	4.952	-0.205509	12.2439	0.821578	DOWN	0.856211	12.113	0.264252	UP	novel-3a-1|novel-3a-2|novel-3a-3|
Novel-3b-3p	AAAGAAACAGAATTTCCGGAGA	22	153	19	56	12	66	2.335	7.707	1.6	7.601	-0.732186	11.0936	0.445397	DOWN	2.90942	12.2544	0.000423146	UP	novel-3b-1|novel-3b-2|novel-3b-3|
Novel-3b-1-5p	CCTCCGGAAGTTCTGTTTCTTT	22	2	0	0	2	0	0	0	0.267	0	0	0	1	_	0	0	1	_	novel-3b-1|novel-3b-2|
Novel-3b-2-5p	TCAGCCTCCGGAAATTCTGTT	21	6	2	3	0	1	0.246	0.413	0	0.115	0	0	1	_	0	0	1	_	novel-3b-3|
Novel-3c-3p	AAAGAAACAGAATTTCCGGAGT	22	127	19	50	10	48	2.335	6.881	1.333	5.528	-0.989182	10.9993	0.298081	DOWN	2.70791	11.8109	0.00123081	UP	novel-3c-1|novel-3c-2|
Novel-3d-3p	AAAGAAACAGAACTTCCGGAG	21	122	18	7	40	57	2.212	0.963	5.332	6.565	1.06043	11.9805	0.202662	UP	0.985799	12.4761	0.191295	UP	novel-3d|
Novel-3e-3p	AAAGACACAGAATTTCCGGAG	21	91	27	24	18	22	3.318	3.303	2.399	2.534	-0.658898	11.6314	0.410207	DOWN	0.760008	11.1731	0.372408	UP	novel-3e-1|novel-3e-2|
Novel-3f-3p	AAAGAAACAGAATTTCCGGAA	21	66	12	20	5	29	1.474	2.752	0.666	3.34	-1.30109	10.2288	0.283653	DOWN	2.94476	11.0271	0.00194758	UP	novel-3f-1|novel-3f-2|novel-3f-3|
Novel-3f-5p	TCCGGAAATTCTGTTTCTTGT	21	2	0	0	0	2	0	0	0	0.23	0	0	1	_	0	0	1	_	novel-3f-1|
Novel-3g-3p	AAAGAAACAGAACTTCCGGA	20	50	5	5	19	21	0.614	0.688	2.533	2.419	1.79547	10.7058	0.0638717	UP	0.616746	11.1651	0.477216	UP	novel-3g|
Novel-3h-3p	AAAGAAACAGAACTTCCGGAGG	22	339	57	81	111	90	7.004	11.147	14.796	10.365	0.877258	13.5148	0.221397	UP	0.177028	13.473	0.816725	UP	novel-3h-1|novel-3h-2|novel-3h-3|
Novel-3h-5p	TCGGAAATTCTGTTTCTTTGT	21	2	0	0	0	2	0	0	0	0.23	0	0	1	_	0	0	1	_	novel-3a-1|novel-3h-2|
Novel-40-5p	GTGAAGAGACATGAGAGGT	19	3227	559	222	1879	567	68.687	30.551	250.462	65.3	1.66715	17.3637	0.0133924	UP	-1.24821	16.9719	0.0614372	DOWN	novel-40|
Novel-40-3p	ACTCTGATCGTTTTTTCACTG	21	328	72	20	177	59	8.847	2.752	23.593	6.795	1.21345	14.0782	0.0817628	UP	-1.10221	13.6142	0.117179	DOWN	novel-40|
Novel-41-3p	AGAGGATGCATTCTGAGTGG	20	3204	394	307	1064	1439	48.412	42.248	141.826	165.727	1.35122	16.6255	0.043899	UP	0.915411	17.1725	0.166645	UP	novel-41|
Novel-42-3p	GGGGTCCGGTGCGGAGAG	18	199	52	23	66	58	6.389	3.165	8.797	6.68	0.261369	13.0126	0.755155	UP	0.292447	12.7838	0.715742	UP	novel-42-1|novel-42-2|
Novel-4a-3p	GATCGGGCCTAAACCGGCAGC	21	148	101	0	45	2	12.41	0	5.998	0.23	-1.24308	13.3377	0.0862047	DOWN	-3.87788	11.2336	0.000343491	DOWN	novel-4a|
Novel-4b-3p	GATCGGGCCTAAACCGGCAGTT	22	1962	1157	36	747	22	142.165	4.954	99.572	2.534	-0.712484	17.0378	0.28119	DOWN	-4.59244	15.198	8.54759e-09	DOWN	novel-4b-1|novel-4b-2|novel-4b-3|
Novel-4c-3p	GATCGGGCCTAAACTGGCAGTA	22	112	40	11	53	8	4.915	1.514	7.065	0.921	0.322768	12.6686	0.665889	UP	-2.21863	11.6328	0.0110349	DOWN	novel-4c|
Novel-4d-3p	GATCGGGCCTAAACCGGCAAT	21	93	58	4	29	2	7.127	0.55	3.866	0.23	-1.07477	12.588	0.149176	DOWN	-3.24911	10.6584	0.00472911	DOWN	novel-4d-1|novel-4d-2|novel-4d-3|
Novel-4d-5p	TGACTGCCGGTTTAGGCCT	19	3	0	2	0	1	0	0.275	0	0.115	0	0	1	_	0	0	1	_	novel-4d-3|
Novel-5-3p	AATATAACACAGATGGCCTATTT	23	146	2	96	2	46	0.246	13.211	0.267	5.298	0	0	1	_	4.81401	11.5737	2.46727e-06	UP	novel-5|
Novel-6-3p	AGAAAAGGTGTTGGTTGAT	19	139	10	9	58	62	1.229	1.239	7.731	7.14	2.42633	12.1992	0.0032194	UP	0.573868	12.7565	0.436716	UP	novel-6-1|novel-6-2|
Novel-7-3p	AGTGGTTAGGATTCGGCG	18	2296	417	548	513	818	51.238	75.414	68.381	94.208	0.217325	15.9912	0.744917	UP	1.15272	16.2789	0.084061	UP	novel-7|
Novel-8a-3p	CTCGGCGCTGTCAGCGGGTGC	21	130	31	68	8	23	3.809	9.358	1.066	2.649	-2.0013	11.4352	0.0269514	DOWN	1.96504	10.8575	0.0380057	UP	novel-8a-1|novel-8a-2|
Novel-8b-5p	CTCGGCGCTGTCAGCGGGTG	20	119	20	45	15	39	2.457	6.193	1.999	4.492	-0.489412	11.2669	0.622031	DOWN	1.8385	11.6696	0.020157	UP	novel-8b|
Novel-9-5p	AGGAGGGAGCTGATCGATGT	20	126	20	5	99	2	2.457	0.688	13.196	0.23	2.21228	13.0057	0.00423552	UP	-5.01031	12.2992	1.2667e-06	DOWN	novel-9|

## Sheet: B
Name	Sequence	Length	Expression					Expression-TPM				HA vs AA				HB vs AB				Hairpin
			Total counts	AA	AB	HA	HB	AA	AB	HA	HB	logFC	logTPM	PValue	Mark	logFC	logTPM	PValue	Mark
Novel-4b-3p	GATCGGGCCTAAACCGGCAGTT	22	1962	1157	36	747	22	142.165	4.954	99.572	2.534	-0.712484	17.0378	0.28119	DOWN	-4.59244	15.198	8.54759e-09	DOWN	novel-4b-1|novel-4b-2|novel-4b-3|
Novel-9-5p	AGGAGGGAGCTGATCGATGT	20	126	20	5	99	2	2.457	0.688	13.196	0.23	2.21228	13.0057	0.00423552	UP	-5.01031	12.2992	1.2667e-06	DOWN	novel-9|
Novel-10-3p	GGGGCACGCCGGCCTTGCGG	20	111	11	1	96	3	1.352	0.138	12.796	0.346	3.0164	12.8481	0.000183788	UP	-4.42728	12.2755	4.44892e-06	DOWN	novel-10-1|novel-10-2|
Novel-25a-5p	GCGTTGGTGGTATAGTGGTGAG	22	1088	225	97	713	53	27.647	13.349	95.04	6.104	1.58147	15.9868	0.0200239	UP	-3.26473	15.2142	8.67452e-06	DOWN	novel-25a-1|novel-25a-2|novel-25a-3|
Novel-14-3p	AAATTTCTGGAGGATGAG	18	97	31	1	63	2	3.809	0.138	8.398	0.23	0.936227	12.6772	0.218709	UP	-4.36065	11.6837	3.70145e-05	DOWN	novel-14-1|novel-14-2|novel-14-3|
Novel-29-5p	AAGGATGTCCGACTGACGGCT	21	50	14	3	32	1	1.72	0.413	4.265	0.115	1.0979	11.6464	0.181118	UP	-4.25948	10.7354	0.000243817	DOWN	novel-29-1|novel-29-2|novel-29-3|
Novel-4a-3p	GATCGGGCCTAAACCGGCAGC	21	148	101	0	45	2	12.41	0	5.998	0.23	-1.24308	13.3377	0.0862047	DOWN	-3.87788	11.2336	0.000343491	DOWN	novel-4a|
Novel-28-5p	AGGATGTCCGACTGACGGCTTA	22	50	6	2	40	2	0.737	0.275	5.332	0.23	2.60747	11.6365	0.00349079	UP	-3.70911	11.0779	0.000814859	DOWN	novel-28-1|novel-28-2|novel-28-3|novel-28-4|
Novel-38-5p	CAGGGGATGTCCGACTGCT	19	238	136	14	80	8	16.711	1.927	10.664	0.921	-0.844951	13.8987	0.228221	DOWN	-2.80997	12.135	0.000964113	DOWN	novel-38-1|novel-38-2|novel-38-3|
miR-139-3p	TGGAGACGCGGCCCTGTTGGAGT	23	3183	912	1430	545	296	112.061	196.792	72.646	34.09	0.374239	8.50196	0.57273	UP	-2.13067	8.40572	0.00191619	DOWN	mir-139|
miR-574b-5p	TGAGTGTGTGTGTGTGAG	18	153	130	19	3	1	15.974	2.615	0.4	0.115	-4.25011	4.64765	1.3156e-05	DOWN	-3.81913	1.98747	0.00304285	DOWN	mir-574b-1|mir-574b-2|
miR-574a-5p	TGAGTGTGTGTGTGTGAGT	19	400	338	31	27	4	41.531	4.266	3.599	0.461	-2.52191	6.12924	0.000632548	DOWN	-2.74225	2.79231	0.00396476	DOWN	mir-574a|
Novel-4d-3p	GATCGGGCCTAAACCGGCAAT	21	93	58	4	29	2	7.127	0.55	3.866	0.23	-1.07477	12.588	0.149176	DOWN	-3.24911	10.6584	0.00472911	DOWN	novel-4d-1|novel-4d-2|novel-4d-3|
miR-486-3p	CGGGGCAGCTCAGTACAGGATG	22	809	365	238	151	55	44.849	32.753	20.128	6.334	-0.156053	6.90782	0.825439	DOWN	-1.96804	5.85183	0.00562275	DOWN	mir-486|
miR-7f-5p	AGAGGTAGTAGGTTGCATAGTT	22	227183	36531	134582	22072	33998	4488.71	18520.8	2942.09	3915.49	0.390234	13.8359	0.551009	UP	-1.84418	15.0194	0.00622658	DOWN	mir-7f|
miR-222-3p	AGCTACATCTGGCTACTGGGTC	22	12491	2639	5218	3277	1357	324.264	718.086	436.809	156.283	1.42941	10.7208	0.0321579	UP	-1.80212	10.3399	0.00754248	DOWN	mir-222|
Novel-2a-3p	AAGCCGGCAGTCAGACATC	19	157	48	4	89	16	5.898	0.55	11.863	1.843	0.806179	13.2215	0.253967	UP	-1.98171	12.4117	0.0100787	DOWN	novel-2a-1|novel-28-3|novel-2a-3|
Novel-15-3p	TAGAAACGTCCAGAGGCACCG	21	1669	38	1067	5	559	4.669	146.837	0.666	64.379	-2.94434	11.5815	0.00182225	DOWN	7.20367	15.1975	3.13632e-14	UP	novel-15|
Novel-37-3p	TAGGAGCAGTGATAGGTAATAT	22	3841	103	2413	26	1299	12.656	332.07	3.466	149.604	-2.05674	13.1663	0.00569548	DOWN	6.10694	16.4293	4.24616e-13	UP	novel-37|
Novel-31-3p	AACGTAGAGGAAATTCCACCTT	22	910	48	385	12	465	5.898	52.983	1.6	53.553	-2.05817	12.0592	0.0145875	DOWN	5.72221	14.948	2.82946e-11	UP	novel-31|
Novel-22-3p	TTGACCAAAGAATAGACCTCCT	22	71	0	36	0	35	0	4.954	0	4.031	0	0	1	_	7.39775	11.1141	2.45054e-06	UP	novel-22|
Novel-5-3p	AATATAACACAGATGGCCTATTT	23	146	2	96	2	46	0.246	13.211	0.267	5.298	0	0	1	_	4.81401	11.5737	2.46727e-06	UP	novel-5|
Novel-34-3p	AGGAGTGTGTAACAACTC	18	329	48	29	31	221	5.898	3.991	4.132	25.452	-0.707605	12.4448	0.363648	DOWN	3.30161	13.9817	1.3293e-05	UP	novel-34|
Novel-32-3p	TGTGGCGGAGTTGGTGAC	18	649	118	340	25	166	14.499	46.79	3.332	19.118	-2.30846	13.3171	0.00203442	DOWN	3.19632	13.5749	3.13017e-05	UP	novel-32|
Novel-36-3p	GCTACTCAGGGGACATTT	18	309	12	64	36	197	1.474	8.807	4.799	22.688	1.48484	11.7045	0.070754	UP	2.92206	13.855	8.30011e-05	UP	novel-36|
Novel-27-3p	ACAGGATGTGAAGTACAGCT	20	52	1	25	2	24	0.123	3.44	0.267	2.764	0	0	1	_	3.88138	10.6461	0.000243817	UP	novel-27|
Novel-3b-3p	AAAGAAACAGAATTTCCGGAGA	22	153	19	56	12	66	2.335	7.707	1.6	7.601	-0.732186	11.0936	0.445397	DOWN	2.90942	12.2544	0.000423146	UP	novel-3b-1|novel-3b-2|novel-3b-3|
Novel-18b-3p	TGACTATCTAGAGGAAGT	18	344	79	51	41	173	9.707	7.018	5.465	19.924	-1.02311	13.052	0.165678	DOWN	2.54863	13.7162	0.000468531	UP	novel-18b|
Novel-18a-3p	TGACTATCTAGAGGAAGTA	19	1471	282	144	222	823	34.65	19.817	29.592	94.783	-0.426178	15.1162	0.529925	DOWN	2.36884	16.0056	0.000663364	UP	novel-18a|
Novel-3c-3p	AAAGAAACAGAATTTCCGGAGT	22	127	19	50	10	48	2.335	6.881	1.333	5.528	-0.989182	10.9993	0.298081	DOWN	2.70791	11.8109	0.00123081	UP	novel-3c-1|novel-3c-2|
Novel-3f-3p	AAAGAAACAGAATTTCCGGAA	21	66	12	20	5	29	1.474	2.752	0.666	3.34	-1.30109	10.2288	0.283653	DOWN	2.94476	11.0271	0.00194758	UP	novel-3f-1|novel-3f-2|novel-3f-3|
miR-590-3p	TAATTTTATGTATAAGCTAGT	21	136	55	7	33	41	6.758	0.963	4.399	4.722	0.378107	4.44059	0.639255	UP	2.64627	3.31792	0.00353459	UP	mir-590|
miR-222-5p	GGCTCAGTAGTCAGTGTA	18	290	35	24	133	98	4.301	3.303	17.728	11.286	3.03081	5.76977	5.79538e-05	UP	2.15835	4.66554	0.00440988	UP	mir-222|

## Sheet: C
Name	Sequence	Length	Expression					Expression-TPM				HA vs AA				HB vs AB				Hairpin
			Total counts	AA	AB	HA	HB	AA	AB	HA	HB	logFC	logTPM	PValue	Mark	logFC	logTPM	PValue	Mark
miR-124b-3p	TAAGGCACGCGGTGAATGCCAA	22	101576	50	62399	111	39016	6.144	8587.16	14.796	4493.4	2.25991	5.61905	0.00185373	UP	-0.536674	14.3126	0.412769	DOWN	mir-124b|
miR-200a-3p	TAACACTGTCTGGTAACGATGTT	23	334	0	204	30	100	0	28.074	3.999	11.517	7.57856	3.2895	2.45054e-06	UP	-0.886215	5.92392	0.198679	DOWN	mir-200a|
miR-200b-3p	TAATACTGCCGGGTAATGATGG	22	420	28	99	269	24	3.44	13.624	35.856	2.764	4.36457	6.70261	3.0845e-08	UP	-1.8932	4.60373	0.0113473	DOWN	mir-200b|
miR-222-5p	GGCTCAGTAGTCAGTGTA	18	290	35	24	133	98	4.301	3.303	17.728	11.286	3.03081	5.76977	5.79538e-05	UP	2.15835	4.66554	0.00440988	UP	mir-222|
miR-3135-5p	GGCTGGTCCGAGTGCAGT	18	6682	4874	808	361	639	598.888	111.195	48.12	73.592	-2.63737	9.93878	0.00015531	DOWN	-0.19769	8.18963	0.765211	DOWN	mir-3135|
miR-363-3p	AATTGCACGGTATCCATCT	19	590	66	210	134	180	8.11	28.9	17.862	20.73	2.13307	5.92111	0.00287447	UP	-0.0815074	6.30096	0.91182	DOWN	mir-363|
miR-378-3p	ACTGGACTTGGAGTCAGAAGGC	22	198036	180178	4624	11775	1459	22139.2	636.341	1569.55	168.03	-2.81847	15.1212	5.51242e-05	DOWN	-1.52323	10.2326	0.0228152	DOWN	mir-378|
miR-448-3p	TTGCATATGTAGGATGTCCCA	21	8783	739	4138	77	3829	90.804	569.459	10.264	440.979	-2.14322	7.30544	0.00225354	DOWN	0.0288125	10.656	0.965304	UP	mir-448|
miR-455-3p	GCAGTCCATGGGCATATACAC	21	1010	535	201	65	209	65.738	27.661	8.664	24.07	-1.92131	6.88537	0.00615576	DOWN	0.196848	6.37958	0.776182	UP	mir-455|
miR-574a-5p	TGAGTGTGTGTGTGTGAGT	19	400	338	31	27	4	41.531	4.266	3.599	0.461	-2.52191	6.12924	0.000632548	DOWN	-2.74225	2.79231	0.00396476	DOWN	mir-574a|
miR-574b-5p	TGAGTGTGTGTGTGTGAG	18	153	130	19	3	1	15.974	2.615	0.4	0.115	-4.25011	4.64765	1.3156e-05	DOWN	-3.81913	1.98747	0.00304285	DOWN	mir-574b-1|mir-574b-2|
miR-7c-5p	TGGAAGACTAGTGATTTT	18	32436	325	10140	983	20988	39.934	1395.44	131.029	2417.15	2.71261	8.72864	0.000111609	UP	1.19027	12.6492	0.0723922	UP	mir-7c|
miR-92b-3p	TATTGCACTCGTCCCGGCCT	20	9041	37	4929	127	3948	4.546	678.314	16.929	454.684	2.88488	5.71959	0.000108099	UP	-0.179383	10.807	0.784329	DOWN	mir-92b|
Novel-10-3p	GGGGCACGCCGGCCTTGCGG	20	111	11	1	96	3	1.352	0.138	12.796	0.346	3.0164	12.8481	0.000183788	UP	-4.42728	12.2755	4.44892e-06	DOWN	novel-10-1|novel-10-2|
Novel-15-3p	TAGAAACGTCCAGAGGCACCG	21	1669	38	1067	5	559	4.669	146.837	0.666	64.379	-2.94434	11.5815	0.00182225	DOWN	7.20367	15.1975	3.13632e-14	UP	novel-15|
Novel-16-3p	GCCGACAGGCGGGCAGGACCAG	22	87	49	25	10	3	6.021	3.44	1.333	0.346	-2.34477	12.0367	0.00620187	DOWN	-1.20128	9.4738	0.390133	DOWN	novel-16|
Novel-17-3p	CGAGGACCATCGGTTGGCGACT	22	81	57	6	12	6	7.004	0.826	1.6	0.691	-2.30495	12.2631	0.00525962	DOWN	-0.505216	9.95935	0.725047	DOWN	novel-17|
Novel-1b-3p	TGATCAGCCGTTGCCTCTCT	20	121	89	7	19	6	10.936	0.963	2.533	0.691	-2.29382	12.9112	0.00268673	DOWN	-1.15553	10.4048	0.253153	DOWN	novel-1b-1|novel-1b-2|
Novel-21-3p	CCCGGCGGGGAAGGTGGCT	19	1424	122	234	707	361	14.991	32.202	94.24	41.576	2.45101	15.8012	0.000491436	UP	-0.489444	15.8307	0.462893	DOWN	novel-21|
Novel-28-5p	AGGATGTCCGACTGACGGCTTA	22	50	6	2	40	2	0.737	0.275	5.332	0.23	2.60747	11.6365	0.00349079	UP	-3.70911	11.0779	0.000814859	DOWN	novel-28-1|novel-28-2|novel-28-3|novel-28-4|
Novel-2a-1-5p	ATGTCCGACTGACGGCTTAGG	21	38	2	2	24	10	0.246	0.275	3.199	1.152	3.35347	10.8147	0.00281198	UP	-0.770595	10.8584	0.445397	DOWN	novel-2a-1|
Novel-32-3p	TGTGGCGGAGTTGGTGAC	18	649	118	340	25	166	14.499	46.79	3.332	19.118	-2.30846	13.3171	0.00203442	DOWN	3.19632	13.5749	3.13017e-05	UP	novel-32|
Novel-37-3p	TAGGAGCAGTGATAGGTAATAT	22	3841	103	2413	26	1299	12.656	332.07	3.466	149.604	-2.05674	13.1663	0.00569548	DOWN	6.10694	16.4293	4.24616e-13	UP	novel-37|
Novel-6-3p	AGAAAAGGTGTTGGTTGAT	19	139	10	9	58	62	1.229	1.239	7.731	7.14	2.42633	12.1992	0.0032194	UP	0.573868	12.7565	0.436716	UP	novel-6-1|novel-6-2|
Novel-9-5p	AGGAGGGAGCTGATCGATGT	20	126	20	5	99	2	2.457	0.688	13.196	0.23	2.21228	13.0057	0.00423552	UP	-5.01031	12.2992	1.2667e-06	DOWN	novel-9|

## Sheet: D
Name	Sequence	Length	Expression					Expression-TPM				HA vs AA				HB vs AB				Hairpin
			Total counts	AA	AB	HA	HB	AA	AB	HA	HB	logFC	logTPM	PValue	Mark	logFC	logTPM	PValue	Mark
miR-222-5p	GGCTCAGTAGTCAGTGTA	18	290	35	24	133	98	4.301	3.303	17.728	11.286	3.03081	5.76977	5.79538e-05	UP	2.15835	4.66554	0.00440988	UP	mir-222|
miR-574a-5p	TGAGTGTGTGTGTGTGAGT	19	400	338	31	27	4	41.531	4.266	3.599	0.461	-2.52191	6.12924	0.000632548	DOWN	-2.74225	2.79231	0.00396476	DOWN	mir-574a|
miR-574b-5p	TGAGTGTGTGTGTGTGAG	18	153	130	19	3	1	15.974	2.615	0.4	0.115	-4.25011	4.64765	1.3156e-05	DOWN	-3.81913	1.98747	0.00304285	DOWN	mir-574b-1|mir-574b-2|
Novel-10-3p	GGGGCACGCCGGCCTTGCGG	20	111	11	1	96	3	1.352	0.138	12.796	0.346	3.0164	12.8481	0.000183788	UP	-4.42728	12.2755	4.44892e-06	DOWN	novel-10-1|novel-10-2|
Novel-15-3p	TAGAAACGTCCAGAGGCACCG	21	1669	38	1067	5	559	4.669	146.837	0.666	64.379	-2.94434	11.5815	0.00182225	DOWN	7.20367	15.1975	3.13632e-14	UP	novel-15|
Novel-28-5p	AGGATGTCCGACTGACGGCTTA	22	50	6	2	40	2	0.737	0.275	5.332	0.23	2.60747	11.6365	0.00349079	UP	-3.70911	11.0779	0.000814859	DOWN	novel-28-1|novel-28-2|novel-28-3|novel-28-4|
Novel-32-3p	TGTGGCGGAGTTGGTGAC	18	649	118	340	25	166	14.499	46.79	3.332	19.118	-2.30846	13.3171	0.00203442	DOWN	3.19632	13.5749	3.13017e-05	UP	novel-32|
Novel-37-3p	TAGGAGCAGTGATAGGTAATAT	22	3841	103	2413	26	1299	12.656	332.07	3.466	149.604	-2.05674	13.1663	0.00569548	DOWN	6.10694	16.4293	4.24616e-13	UP	novel-37|
Novel-9-5p	AGGAGGGAGCTGATCGATGT	20	126	20	5	99	2	2.457	0.688	13.196	0.23	2.21228	13.0057	0.00423552	UP	-5.01031	12.2992	1.2667e-06	DOWN	novel-9|

## Sheet: E
Name	Sequence	Length	Expression					Expression-TPM				HA vs AA				HB vs AB				Hairpin
			Total counts	AA	AB	HA	HB	AA	AB	HA	HB	logFC	logTPM	PValue	Mark	logFC	logTPM	PValue	Mark
miR-1298-5p	TTCATTCGGATGTCCAGATGT	21	646	0	238	0	408	0	32.753	0	46.989	0	0	1		0.91764	7.05209	0.173764	UP	mir-1298|
miR-124-5p	CGTGTTCACAGCGGACCTTGA	21	354	0	143	0	211	0	19.679	0	24.3	0	0	1		0.700991	6.17911	0.305381	UP	mir-124-1|
miR-153-5p	GTCATTTTTGTGGCGTTGCAG	21	271	0	107	0	164	0	14.725	0	18.888	0	0	1		0.755425	5.79459	0.275634	UP	mir-153|
miR-153-3p	TTGCATAGTCACAAAAGTGATCA	23	190	0	92	0	98	0	12.661	0	11.286	0	0	1		0.231319	5.27049	0.757802	UP	mir-153|
miR-551-3p	GCGACCCATACTTGGTTTCAG	21	189	0	63	0	126	0	8.67	0	14.511	0	0	1		1.13751	5.28195	0.108216	UP	mir-551|
miR-1298-3p	CATCTGGGCAACTGATTGA	19	147	0	50	0	97	0	6.881	0	11.171	0	0	1		1.09282	4.91791	0.131259	UP	mir-1298|
miR-873-3p	GAGACTGACGAGTTCCCGGGAA	22	83	0	47	0	36	0	6.468	0	4.146	0	0	1		-0.24241	4.06579	0.774231	DOWN	mir-873|
Novel-22-3p	TTGACCAAAGAATAGACCTCCT	22	71	0	36	0	35	0	4.954	0	4.031	0	0	1	_	7.39775	11.1141	2.45054e-06	UP	novel-22|
miR-876-5p	TGGATTTCTTTGTGAATCACC	21	55	0	19	0	36	0	2.615	0	4.146	0	0	1		1.0525	3.49531	0.188387	UP	mir-876|
miR-432-3p	CTGGATGGCTCCTCCATGTCT	21	12	0	4	0	8	0	0.55	0	0.921	0	0	1		1.09145	1.29057	0.497906	UP	mir-432|
miR-876-3p	GTGGTTTACAAAGTAATTCA	20	12	0	2	0	10	0	0.275	0	1.152	0	0	1		2.3189	1.29939	0.0999758	UP	mir-876|
miR-3958-5p	AGGTTGTCCGTGATGTATTTGC	22	9	0	2	0	7	0	0.275	0	0.806	0	0	1		0	0	1		mir-3954|
miR-448-5p	AACATCCTGCATAGTGCTGCCA	22	8	0	5	0	3	0	0.688	0	0.346	0	0	1		0	0	1		mir-448|
miR-218b-3p	ATGGTTCTGTCAAGCACCG	19	6	0	2	0	4	0	0.275	0	0.461	0	0	1		0	0	1		mir-218b|
Novel-31-5p	AAGGCGGATATTCCTTCTATGT	22	3	0	0	0	3	0	0	0	0.346	0	0	1	_	0	0	1	_	novel-31|
Novel-4d-5p	TGACTGCCGGTTTAGGCCT	19	3	0	2	0	1	0	0.275	0	0.115	0	0	1	_	0	0	1	_	novel-4d-3|
miR-383-3p	ACAGCACTACCTGGTCAGAAA	21	2	0	2	0	0	0	0.275	0	0	0	0	1		0	0	1		mir-383|
miR-744-3p	CTGTTGCCACTAACCTCAACCT	22	2	0	2	0	0	0	0.275	0	0	0	0	1		0	0	1		mir-744|
Novel-3f-5p	TCCGGAAATTCTGTTTCTTGT	21	2	0	0	0	2	0	0	0	0.23	0	0	1	_	0	0	1	_	novel-3f-1|
Novel-3h-5p	TCGGAAATTCTGTTTCTTTGT	21	2	0	0	0	2	0	0	0	0.23	0	0	1	_	0	0	1	_	novel-3a-1|novel-3h-2|
miR-28-5p	CAAGGAGCTCACAGTCTATT	20	1	0	0	0	1	0	0	0	0.115	0	0	1		0	0	1		mir-28|
miR-285-1-5p	GCTGGTTTCATATGGTGG	18	1	0	0	0	1	0	0	0	0.115	0	0	1		0	0	1		mir-285-1|
miR-7g-3p	CTGTACAGGCCACTGCCTTG	20	1	0	0	0	1	0	0	0	0.115	0	0	1		0	0	1		mir-7g|
Novel-10-5p	AGTGGGAGGCCCCCGGCGCC	20	2	0	0	2	0	0	0	0.267	0	0	0	1	_	0	0	1	_	novel-10-1|novel-10-2|
Novel-3b-1-5p	CCTCCGGAAGTTCTGTTTCTTT	22	2	0	0	2	0	0	0	0.267	0	0	0	1	_	0	0	1	_	novel-3b-1|novel-3b-2|
miR-10-3p	CAAATTCGTATCTAGGGGAA	20	2	2	0	0	0	0.246	0	0	0	0	0	1		0	0	1		mir-10|
miR-7a-3p	CTATACAACTTACTACTTT	19	2	2	0	0	0	0.246	0	0	0	0	0	1		0	0	1		mir-7a|
Novel-16-5p	TGGCCTGCCCGCCAGTCGG	19	2	2	0	0	0	0.246	0	0	0	0	0	1	_	0	0	1	_	novel-16|
miR-16-2-3p	ACCAATATTATTGTGCTGCTTT	22	5	3	0	2	0	0.369	0	0.267	0	0	0	1		0	0	1		mir-16-2|
Novel-2a-2-5p	GGATGTCCGACTGCCGGCTTA	21	12	7	0	5	0	0.86	0	0.666	0	-0.54379	9.72108	0.822492	DOWN	0	0	1	_	novel-2a-3|
miR-7e-3p	CTATACAATCTATTGCCTTC	20	8	8	0	0	0	0.983	0	0	0	0	0	1		0	0	1		mir-7e|
